# Supplementary material for: DMDRMR -Mediated Regulation of m6A-Modified CDK4 by m6A Reader IGF2BP3 Drives ccRCC Progression
Source: Oxford University Press journal article supplement (doi:10.1158/0008-5472.can-20-1619), 2020-12-08
Supplement: 00085472can201619-sup-243365_2_supp_6741596_qk7hgw.xlsx [file 00085472can201619-sup-243365_2_supp_6741596_qk7hgw.xlsx]

## Sheet: Sheet1
145 overlapping genes by downregulated genes of DMDRMR KD RNA-sequence data and IGF2BP3 binding genes of IGF2BP3 RIP- and CLIP-sequence data.
gene name
NAPRT
HERC2P2
PLEKHG4
IL18BP
CELSR3
DDI2
PCED1A
CCDC14
TMEM132A
PKN3
EFHD2
SH3D21
RTEL1-TNFRSF6B
ATP2B4
SLC39A10
TFCP2
DUSP8
POLI
GOLGA2P5
DMPK
NFKBID
PGAP3
PLEC
SNHG17
MDN1
ST3GAL3
CUEDC1
PRR7-AS1
MTMR3
MDM4
ITPK1
DDX11
CERK
COL9A2
CCDC57
SLC6A6
FN1
MTHFD1
CDK4
ZFAND6
UBXN11
CDK5RAP3
EGLN2
BZW2
CRMP1
TPM2
WDR90
RUFY3
KCNIP2
SREBF1
COL27A1
CCDC78
CCDC183
KDM5C
ADAT2
GOLGA8A
XRCC3
PDPR
CPT1B
HSF4
CYTH2
RNF207
NBEAL2
TTLL3
GIPC1
ADGRA3
PDCD5
NEIL1
POLR2J4
STRIP1
MTG1
AGER
CEP164
VEGFA
MAN2C1
YJEFN3
SPNS1
AGRN
CCDC17
WASH2P
WDR27
PTOV1-AS2
DMWD
LCAT
AMPD2
ZBTB40
GNB3
PSPH
LAPTM4A
ZNF513
PAQR6
ZNF692
MERTK
NEAT1
CCNL2
MAP7D2
LENG8
RRP1B
SLC4A7
VARS2
PABPC1L
CCDC65
TMEM198B
ABCA7
HPX
COL6A1
ATP13A1
TLN1
ENOSF1
ABHD2
HPS4
NR2C2
FAM229A
YWHAH
FANCA
CHTF18
SCART1
SLC26A6
VAC14
STK36
CLSTN3
CEMIP
TERT
LINC01089
MAPK8IP3
L3MBTL1
CROCC
ATF3
ABCA1
MYH9
SEC31B
RAP1GAP
REC8
MFSD10
LAMA5
ECI2
ISYNA1
STK11IP
LIME1
SLC7A5
CADM1
SGSM2
KLHL17
SMARCA2
THBS3
