# Supplementary material for: DMDRMR -Mediated Regulation of m6A-Modified CDK4 by m6A Reader IGF2BP3 Drives ccRCC Progression
Source: Oxford University Press journal article supplement (doi:10.1158/0008-5472.can-20-1619), 2020-12-08
Supplement: 00085472can201619-sup-243365_2_supp_6751555_qk883w.docx [file 00085472can201619-sup-243365_2_supp_6751555_qk883w.docx]

**Supplementary Information**

***DMDRMR*-mediated regulation of m6A-modified *CDK4* by m6A reader IGF2BP3 drives ccRCC progression**

Yinmin Gua,b,1, Shaoxi Niuc,1, Yang Wangd, Liqiang Duand, Yongbo Pand, Zhou Tongd, Xu Zhangc, Zhenyu Yanga,b, Bo Penga,b, Xiaodong Wanga,b, Xiaoqi Hane, Yuxin Lif, Tianyou Chengd, Yajuan Liud, Lina Shangd, Tongfeng Liue, Xiwang Yange, Minxuan Suna, Siyuan Jianga, Chang Zhanga, Ning Zhangg, Qinong Yeh, and Shan Gaoa,d,2

Corresponding author: Shan Gao

Email: gaos@sibet.ac.cn

**This supplementary information contains:**

- 44 Pages
- Supplementary Materials and Methods
- Supplementary Figures (15 Figures)
- Supplementary Tables (12 Tables)
- References

**Supplementary Materials and Methods**

**Data collection**

Illumina Infinium Human Methylation450 BeadChip rawdata, RNASeqV2 level 3 RSEM normalized expression data and clinical data were downloaded from TCGA Pan-Cancer project. LncRNA expression data was downloaded from Mitranscriptome database. The public database Gene Expression Omnibus (GEO) (1), Accession No. GSE53757, GSE16441 and GSE36895 for ccRCC tissues were used. DNA methylation datasets were downloaded from GSE61441, GSE70303 and E-MTAB-2007. The m6A RIP-sequence data on HepG2 cell line was obtained from the GSE90642. The IGF2BP3 RIP-sequence data on HEK293T cell line was obtained from the GSE90639. The IGF2BP3 CLIP-sequence data on HepG2 cell line was downloaded from GSE92220. The c-Jun ChIP-sequence data on K562 and Hela cell lines were obtained from GSE31477.

**qRT-PCR and RNA-sequence and analysis**

Total RNA isolated using RNAiso Plus (Takara) was subject to reverse transcription using PrimeScript™ RT reagent Kit with gDNA Eraser (Takara). qRT-PCR was performed using SYBR premix EX Taq (TaKaRa) and analysed with QuantStudio 7 Flex Real-Time PCR System (Thermo Fisher). PCR results, recorded as CT numbers, were normalized against an internal control (*GAPDH*). The relative gene expression levels were analysed using the 2-ΔΔCT method (2). The primers used in all qRT-PCR assays were listed in Table S6. Transcriptional copy-number was measured by using standard curve method and the exact copy number of *DMDRMR* transcript was calculated by relating the CT value to standard curve (3).

RNA-sequence of *DMDRMR* KD and control cells were performed and analysed by Novogene (Beijing, China). Raw read counts were used for differential gene expression analysis by DESeq2 (4). Genes with *FDR* < 0.05 and log2 Fold change (FC) > 0.8 were counted as upregulated genes, and genes with *FDR* < 0.05 and log2 FC < -0.8 were counted as downregulated genes. The RNA sequencing data from this study have been deposited in the NCBI Sequence ReadArchive (BioProject accession: PRJNA614585).

**5' and 3' RACE**

The 5'- and 3'-RACE analyses were preformed to determine the transcriptional initiation and termination sites of *DMDRMR* by using SMARTer® RACE cDNA Amplification Kit (Clontech, Palo Alto, CA) according to the manufacturer's instructions. In brief, the extracted RNA was subjected to cDNA synthesis using the reverse transcriptase contained in this kit. The obtained band was purified and cloned with the pGEM-T vector (Promega). The gene-specific primers used for the PCR of the RACE assay were as follows: 5'RACE, 5'-CATGAAGGTGTTCCCGCCAT-3'; 3'RACE, 5'-GACGCACATCAGGAAGACAG-3'. Nucleotide sequences of *DMDRMR* were shown in Table S12.

**RIP**

RIP was performed using EZ-Magna RIP™ RNA-Binding Protein Immunoprecipitation Kit (merckmillipore) according to the manufacturer's instructions. Briefly, approximately 3×107 cells were washed twice with 10 ml ice-cold phosphate-buffered saline (PBS). Cells were lysed in 200 μl RIP lysis buffer with 1 μl of protease inhibitor cocktail and 0.5 μl of RNase inhibitor, and supernatants were collected after centrifugation. Cell lysates were incubated with A/G magnetic beads (Millipore) coated with the indicated 5 μg anti-IGF2BP3 at 4°C for 4 hours (h) to overnight. 20 μl of supernatant of the RIP lysate was saved as input. After washing using RIP wash buffer six times, the-bound immunocomplexes were re-suspended in 150 µl of proteinase K buffer (117 µl of RIP Wash Buffer, 15 µl of 10% SDS, and 18 µl of proteinase K) and incubated at 55°C for 30 min with shaking to digest the protein. Samples were centrifuged, and the supernatants were used to extract RNA by RNeasy Mini Kit (QIAGEN). Purified RNAs were subjected to cDNA synthesis and then qRT-PCR analysis. The primers used were listed in Table S5.

**Gene-specific m6A RIP qRT-PCR**

m6A RIP qRT-PCR was conducted according to previously described protocol (5). Briefly, the total RNA was extracted using Trizol and fragmented by RNA fragmentation reagents (Thermo, AM8740), and then treated with TURBO DNase (2 U/µl) (Invitrogen, AM2239). 100 μg purified RNA was incubated with A/G magnetic beads (Millipore) coated with 8 μg anti-m6A antibody (#202003, Synaptic Systems) at 4°C for 4 h to overnight in 500 μl of RIP buffer (150 mM NaCl, 0.1% NP-40, 10 mM Tris, pH 7.4, 100 U RNase inhibitor). 10 μg purified RNA was saved as input. The following procedure as the described above RIP method. The following procedure as the RIP method. The primers used were listed in Table S5.

**FISH**

Probes targeting *DMDRMR* was transcribed in vitro and labeled using the DIG RNA LABELING KIT (SP6/T7). Cells were fixed 4% paraformaldehyde and permeabilized in PBS containing 0.5% Triton X-100, then hybridized with the digoxin (DIG)-labeled probe at 50°C for 16 h. Cells were then washed and incubated overnight at 4°C with Alexa Fluor 647-conjugated IgG Fraction Monoclonal Mouse anti-DIG antibody (#140118, 1:400, Jackson) and/or anti-IGF2BP3 antibody. Cells were then washed and incubated overnight at 4°C with Alexa Fluor 488 anti-rabbit IgG (#4412, 1:500, CST). Nuclei were stained by DAPI. Fluorescence images were obtained from high speed confocal microscope (ANDOR, Oxford Instruments).

Expression of *DMDRMR* in a tissue array (Table S2) was examined within ISH. Briefly, ccRCC tissues were digested with proteinase K (20 μg/ml) and fixed in 4% paraformaldehyde, then hybridized with the DIG-labeled probe at 37°C for 24 h. After washing, tissues were incubated overnight at 4°C with anti-DIG-Alkaline Phosphatase (AP) antibody (Boster) and then were dyed using AP Assay Kit (Beyotime). Cell nuclei counterstained with 0.1% Nuclear Fast Red solution (Solarbio). Probe sequence targeting *DMDRMR* was shown in Table S7.

**Northern blot**

Northern blot was performed using NorthernMax Kit (Ambion, USA) as previously reported (3). Briefly, 20 µg of indicated RNA was loaded onto formaldehyde gel electrophoresis and then electro-transferred to a Hybond nylon membrane (GE Healthcare, USA) and fixed by UV crosslinking at 1200 µJ. The membrane was prehybridized at 58°C for 1 h in UltrahybTM Hybridization buffer and hybridized with DIG-labeled probe for *DMDRMR*, which was also utilized for ISH at 200 nM at 58°C overnight. After washing 2 times with washing buffer at 58°C for 10 min, the membrane was incubated with blocking solution and then with anti-DIG-AP antibody for 1 h and detected using DIG Luminescent Detection Kit (Roche).

**Expression vectors, shRNAs and small guide RNA (sgRNA)**

To generate lentiviruses expressing the indicated shRNAs or indicated genes, HEK293T cells were transfected with shRNAs (cloned in pSIH-H1-Puro) or genes full-length with 3×FLAG at the 3'-terminus (cloned in pLVX-IRES-Neo), PMD2.G and psPAX2 with a ratio of 8: 6: 3. For generation of the control virus, pSIH-H1-Puro or pLVX-IRES-Neo empty vector was used. 24 h after transfection, cells were cultured in fresh medium for an additional 48-72 h. The culture medium containing lentivirus particle was centrifuged at 4,000 g for 10 min, and the cleared supernatant was used for infection. The effective lentivirus-mediated KD and OE were verified by qRT-PCR or immunoblot analysis in each experiment. The shRNA sequences were shown in Table S8. *DMDRMR* KO 786-O cell was generated by CRISPR/Cas9. The sgRNAs (5'-CTCGATTAGAGAGTGTGCTGCGG-3' and 5'-GTGGGTTGGCGGGCCTAGTTGG

-3') were designed and synthesized by Genloci Biotechnologies Inc (Nanjing, China). The KO efficiency of *DMDRMR* was confirmed by qRT-PCR and DNA sequence.

**Cell proliferation assay and cell cycle analysis**

The cells were seeded in 96-well plates, with each well containing 1500-2000 cells in 100 μl of cell suspension. After a certain time in culture, cell viability was measured using CellTiter-Glo Luminescent™ Cell Viability Assay assays (Promega). To measure cell cycle progression, the cells were fixed in 70% ethanol at 4°C overnight and washed with PBS three times. Then, the cells were treated with FxCycle PI/RNase Staining Solution (Thermo Fisher Scientific Inc.) for 30 min. Cell cycle was analysed using BD FACSCelestaTM (BD Bioscience) using the CELLQuest TM software. Images were analysed by FlowJo software (FlowJo, LLC).

**Soft agar colony formation assay**

For each well, 300 μl of 0.6% Agarose (Sigma) in culture medium was plated into 24-well plates as the bottom layer. 300 μl of cell mixture containing 5000 cells in culture medium and a final concentration of 0.35% agarose was plated on top of the bottom layer. The plates were incubated at 37°C and 5% CO2 until colonies were formed, and cells were fed with 200 µl of cell culture medium every other week. After 2-3 weeks, the number of colonies was counted.

**Invasion assay and migration assay**

Invasion assays were performed in the membrane invasion culture system using polyethylene terephthalate membrane (8 μm pore size) in the upper compartment of a transwell coated with Matrigel (BD BioCoat Matrigel Invasion Chamber; BD Biosciences). The migration assay was conducted similarly, without coating the filters with Matrigel. 4×104 cells in serum-free medium were added to the upper chamber, while 600 μl medium supplemented with 10% FBS were added into the lower chamber and served as a chemotactic agent. After incubation, cells that migrated through the filters were fixed with methanol and stained with crystal violet. The stained cells were destained with 33% acetic acid. The ability of cell invasion or migration was then assessed by measuring the absorbance at 560 nm.

**RNA pull-down assay**

Biotin-labeled full-length and truncated fragments of *DMDRMR* RNA were transcribed in vitro with a Biotin RNA Labeling Mix Kit (Roche) and T7 RNA polymerase (Roche), then treated with RNase-free DNase I (TransGen Biotech), and then precipitate the RNAs by adding 0.1 volumes of 3 M sodium acetate (pH 5.2) (Thermo Scientific™), 2.2 volumes of 100 % ethanol (ice cold), and 1 μl glycogen (Thermo Scientific™), mix thoroughly, and store at −20°C overnight. Biotinylated RNA was folded in RNA structure buffer (10 mM Tris-HCl pH 7.0, 0.1 M KCl, 10 mM MgCl2) at 95°C for 5 min, immediately put on ice for another 2 min, and then transferred to room temperature (RT) for 20 min to allow proper RNA secondary structure formation. Approximately 2×107 cells were lysed in 1.5 ml of Radio Immunoprecipitation Assay (RIPA) lysis buffer (Beyotime Biotechnology Inc.) containing 1% protease inhibitor cocktail (Sigma). 2 pmol biotinylated RNA was incubated with 5 mg protein from cell extracts at RT for 1 h. 50 μl of washed Pierce™ Streptavidin Magnetic Beads (Thermo Scientific™) were added to each binding reaction and further incubated at RT for 1 h and then washed for six times. The proteins binding to the streptavidin-coupled dynabeads were resolved by sodium dodecyl sulfate-polyacrylamide gel electrophoresis (SDS-PAGE), then silver-stained and the specific bands were excised and analysed by mass spectrometry (Shanghai Applied Protein Technology Co. Ltd, China).

**ChIP**

ChIP was performed with Magna ChIP HiSens Chromatin IP Kit (Merck Millipore) according to the manufacturer's instructions. In brief, cells were cross-linked with 4% formaldehyde for 10 min at 37°C, and then sonicated using a covaris M220 to generate 200-500 bps DNA fragments. IP was performed with anti-FLAG antibody (Cell Signaling Technology). The binding of FLAG to *DMDRMR* promoter was quantified using qRT-PCR. The specific primers used were listed in Table S9.

**Quantitative DNA methylation**

The methylation level of cg00440032 was evaluated with pyrosequencing. Genomic DNAs from the 48 ccRCC tissues were extracted with QIAamp DNA Mini Kit (Qiagen), and then bisulfite converted using an EZ DNA Methylation Gold kit (Zymo Research). After PCR amplification using a PyroMark® PCR Kit (Qiagen), quantitative measurement of DNA methylation was performed on a PyroMark Q96 MD Pyrosequencer following the manufacturer's protocol, and analysed using the Pyro Q-CpG software (Biotage, Uppsala, Sweden). DNA methylation of *DMDRMR* promoter was quantified by MassARRAY EpiTYPER assays (Sequenom, San Diego, CA, USA). Procedures of methylation assessments and quality controls had been described previously (6). The PCR and sequencing primers of cg00440032 and *DMDRMR* promoter used were listed in Table S10.

**Immunoblot**

Whole cell lysates were prepared using RIPA lysis buffer (Beyotime Biotechnology Inc.) containing 1% protease and phosphatase inhibitor cocktails (sigma). After quantification using a BCA protein assay kit (Beyotime Biotechnology Inc.). Total protein was subjected to SDS–PAGE and transferred to PolyVinylideneFluoride (PVDF) membrane (Millipore). The membrane was blocked for 1 h in wash buffer (PBS containing 0.1% Tween 20) containing 5% nonfat dry milk followed by an overnight incubation with primary antibody diluted at 4°C. After extensive washing, the membrane was incubated with secondary antibody for 1.5 h in blocking buffer, washed, and processed using the immobilon western horseradish peroxidase substrate kit (Millipore). The antibodies used were given in Table S11.

**Luciferase reporter assay**

Luciferase reporter assay according to the manufacturer's instructions. Briefly, c-Jun OE cells were co-transfected with the indicated pmirGLO, pmirGLO-*DMDRMR* promoter-WT, pmirGLO-*DMDRMR* promoter-MUT. *DMDRMR* OE cells were co-transfected with the indicated pmirGLO, pmirGLO-*CDK4* 5' UTR-WT or pmirGLO-*CDK4* 5' UTR-MUT, and followed by METTL3, METTL14 or IGF2BP3 KD using JetPRIME ® DNA and siRNA Transfection Reagent (Polyplus transfection, New York, NY). Each group was run in a 24-well plate. The luciferase activities were detected by Dual-Luciferase Reporter Assay System (Promega, USA) after 48 h of transfection. Renilla luciferase activity was normalized against firefly luciferase activity.

**Subcellular fractionation**

Cell nucleus/cytoplasm fraction isolation was performed according to previously described protocol (7). Finally, qRT-PCR and immunoblot analysis were used to assess the total RNA and protein isolated from the subcellular fractions.

**IHC**

The protein expression of IGF2BP3 in a tissue array (Table S2) was evaluated (Shanghai Outdo Biotech CO.). IHC staining using anti-IGF2BP3 antibody was performed and analysed as described previously (8).

**Supplementary Figures**

**
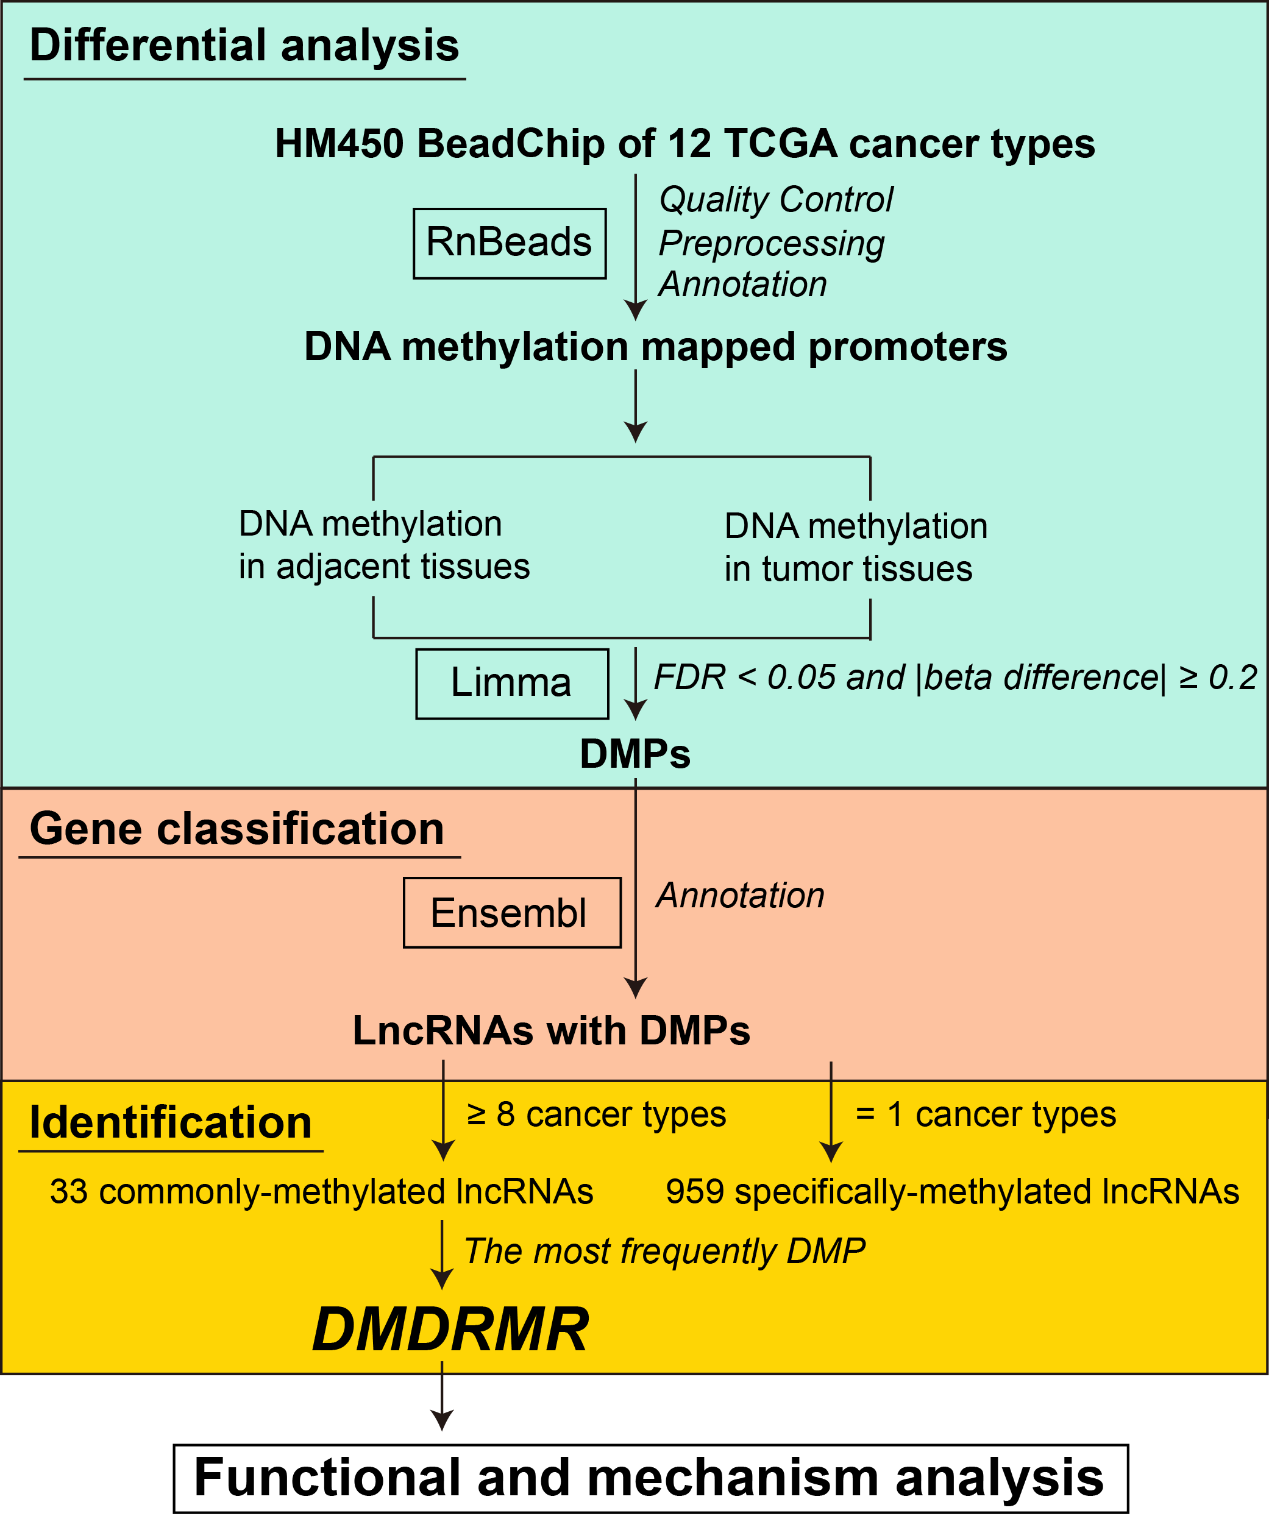
**

**Figure S1.** Flow chart of identification of DMD lncRNAs in cancers.

**
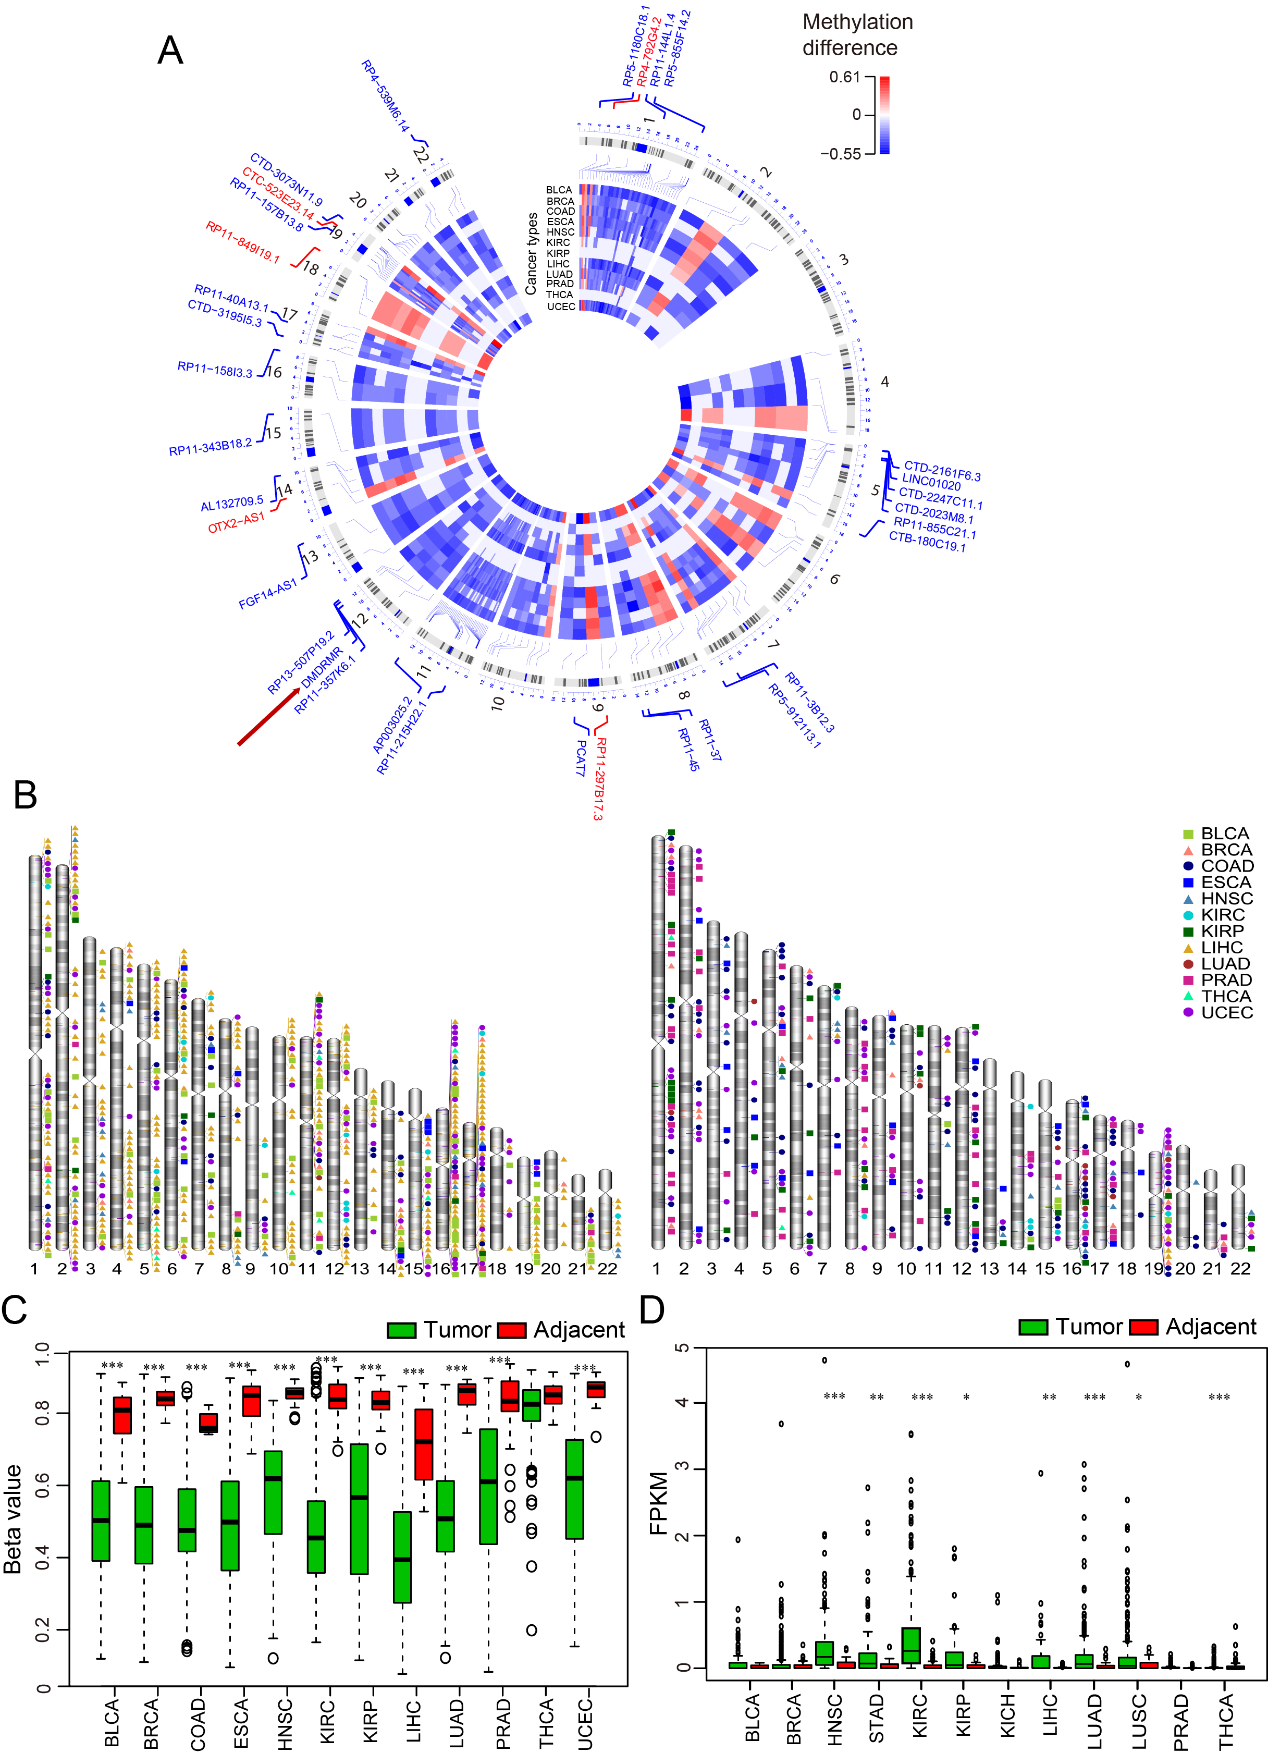
**

**Figure S2. The DNA methylation and expression levels of *DMDRMR* in 12 cancer types.** (A) Circos plot of 28 common hypomethylated (blue) and 5 common hypermethylated (red) promoters identified across 12 cancer types. Chromosome numbers and lncRNAs are indicated on the external circle. Each track represents a given cancer. The red arrow points to the *DMDRMR.*(B) Karyotype plot of the specific hypomethylated (left) and hypermethylated (right) lncRNAs across 12 cancer types. Chromosome numbers are indicated under the Karyotypes. (C) Box plot showing the DNA methylation levels of *DMDRMR* in tumor (green) and adjacent (red) tissues across 12 cancer types. (D) Box plot showing the *DMDRMR* expression levels in tumor (green) and adjacent (red) tissues across 12 cancer types. Fragments Per Kilobase Million (FPKM), Bladder urothelial carcinoma (BLCA), breast invasive carcinoma (BRCA), colon adenocarcinoma (COAD), esophageal carcinoma (ESCA), head and neck squamous cell carcinoma (HNSC), kidney renal clear cell carcinoma (KIRC), kidney renal papillary cell carcinoma (KIRP), liver hepatocellular carcinoma (LIHC), lung adenocarcinoma (LUAD), prostate adenocarcinoma (PRAD), thyroid carcinoma (THCA), and uterine corpus endometrial carcinoma (UCEC), stomach adenocarcinoma (STAD), kidney chromophobe (KICH), lung squamous cell carcinoma (LUSC). **p* < 0.05, ***p* <0.01, and ****p* < 0.001.

**
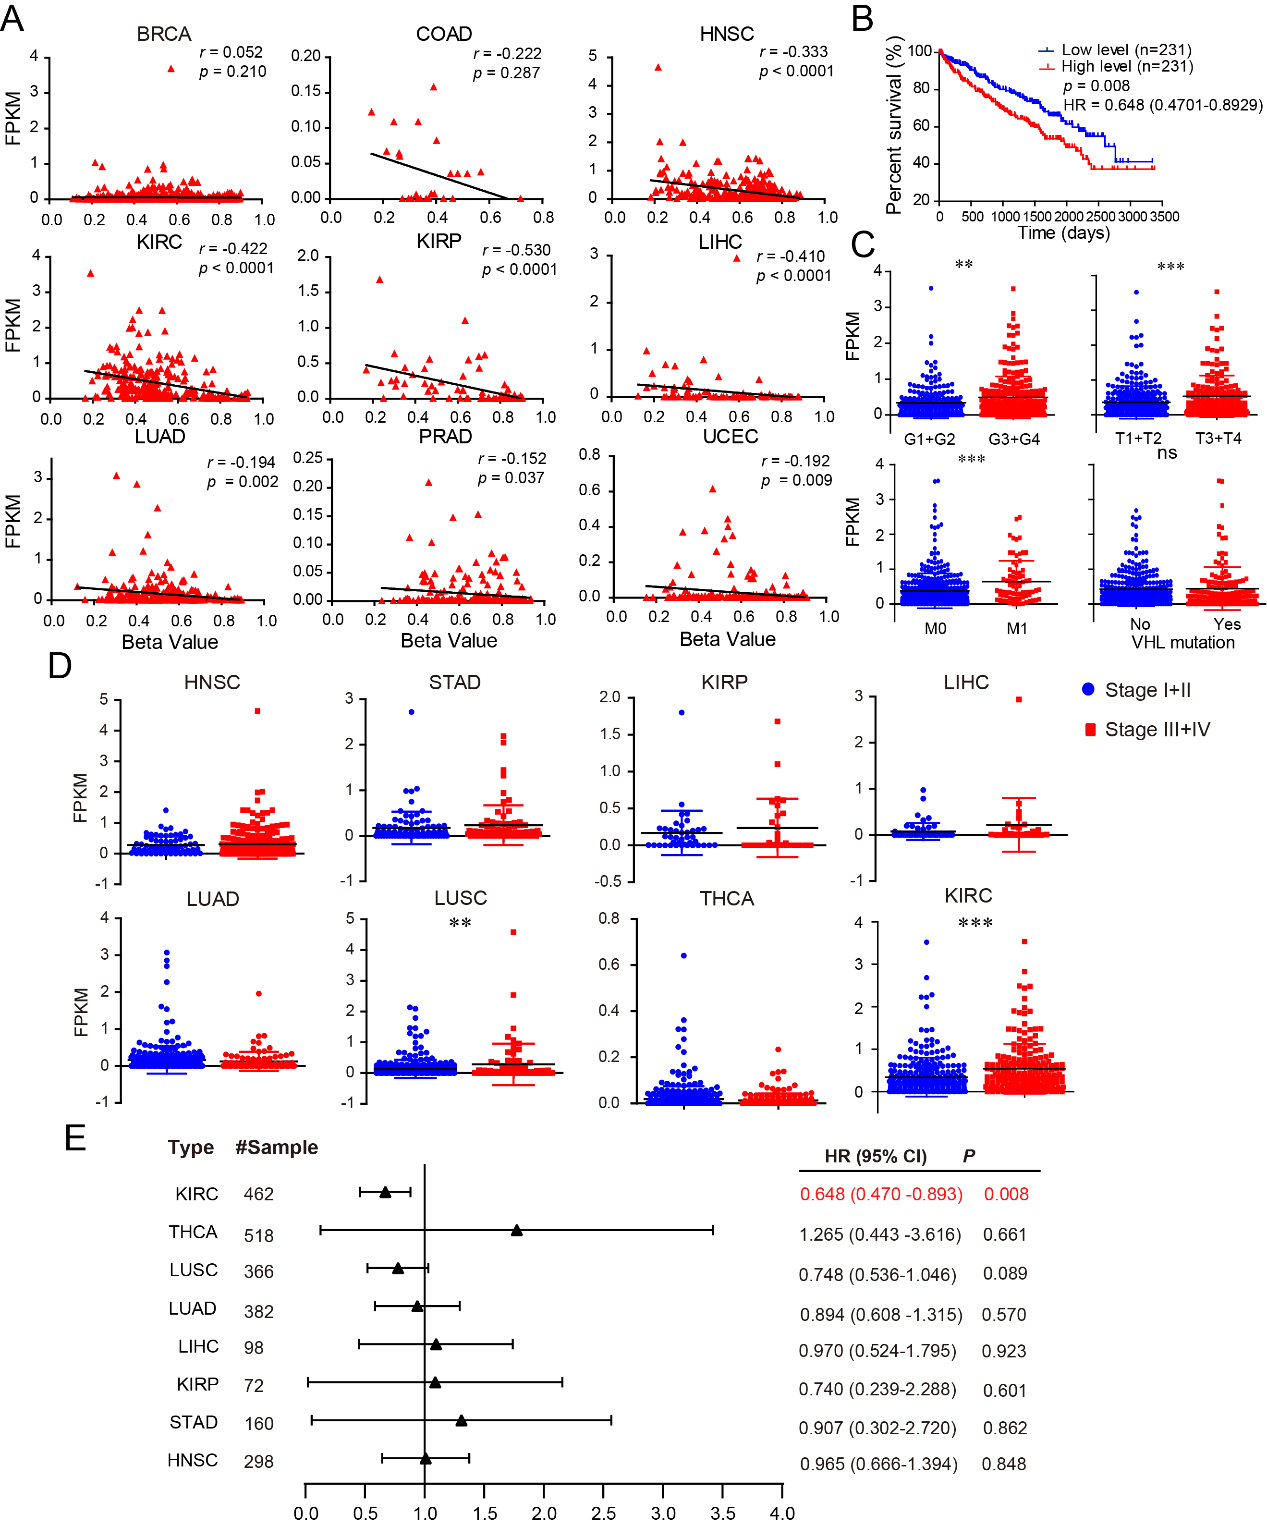
Figure S3. The correlations of *DMDRMR* expression and promoter methylation levels or clinical outcomes in cancers.** (A) Correlation analysis between promoter methylation and expression levels of *DMDRMR* in 9 cancer types. (B) Kaplan-Meier curve representing the percent of ccRCC patient that survive according to a high or low *DMDRMR* level. The median *DMDRMR* level was used as the cut-off value. (C) The expression levels of *DMDRMR* in fuhrman grade (G1+2 versus G3+4), tumor size (T1+2 versus T3+4), metastatic (M0 versus M1) and VHL mutation status (No versus Yes) of ccRCC patients. (D) The expression levels of *DMDRMR* by pathologic stage (stage I+II versus stage III+IV) across 8 cancer types. (E) Forest plot of *DMDRMR*'s association with overall survivals in 8 cancer types. All the bars correspond to 95% confidence intervals (CI). The results are presented as mean ± SD. ***p* < 0.01.

**
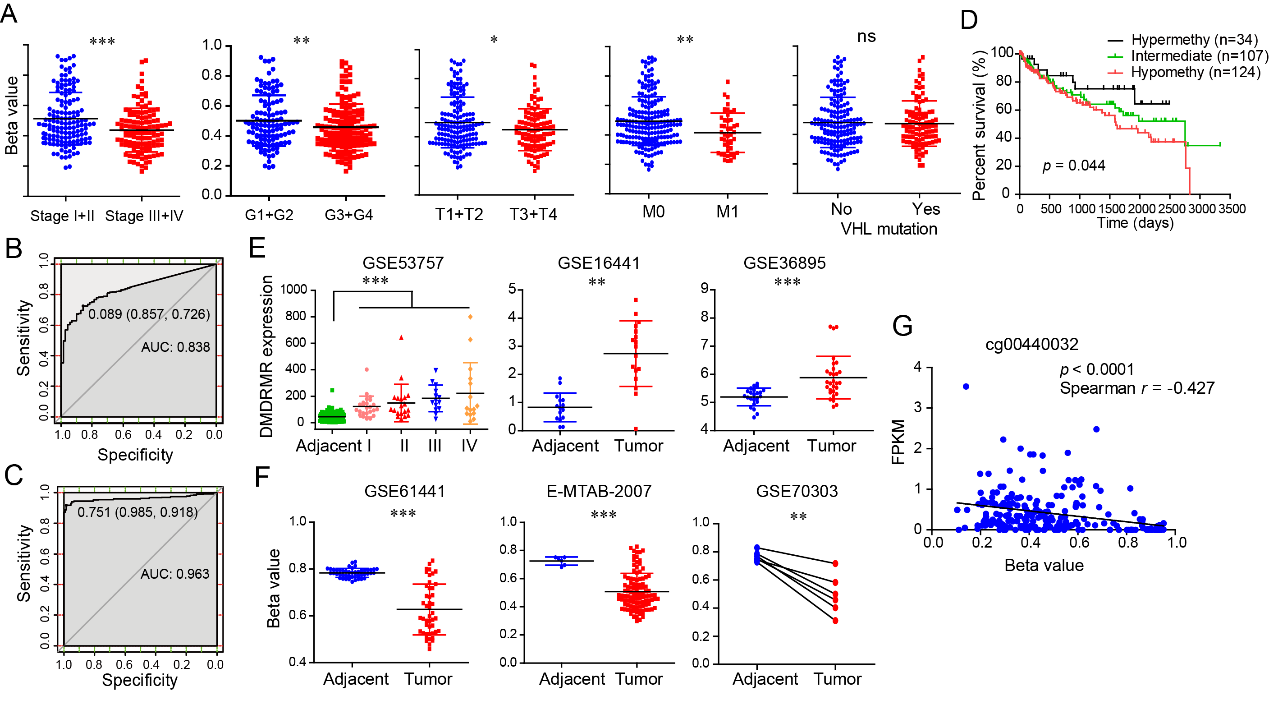
Figure S4. *DMDRMR* is associated with poor outcomes for ccRCC patients.** (A) The DNA methylation levels of *DMDRMR* in pathologic stage (stage I+II versus stage III+IV), fuhrman grade (G1+2 versus G3+4), tumor size (T1+2 versus T3+4), metastatic (M0 versus M1) and VHL mutation status (No versus Yes) of ccRCC patients. (B-C) The ROC curves based on *DMDRMR* expression (B) and promoter methylation (C) levels for discrimination of ccRCC tissues. (D) Kaplan-Meier curve representing the percent survival of ccRCC patients by three subgroups. (E) The expression levels of *DMDRMR* in tumors and adjacent tissues of ccRCC patients from three independent GEO data (GSE53757, GSE16441 and GSE36895). (F) The promoter methylation levels of *DMDRMR* in tumors and adjacent tissues of ccRCC patients from two independent GEO data (GSE61441 and GSE70303) and an ArrayExpress data (E-MTAB-2007). (G) Correlation analysis between cg00440032 methylation and *DMDRMR* expression levels in TCGA ccRCC and adjacent tissues. The results are presented as mean ± SD. * *p* < 0.05, ** *p* < 0.01, *** *p* < 0.001. ns, no significant.

**
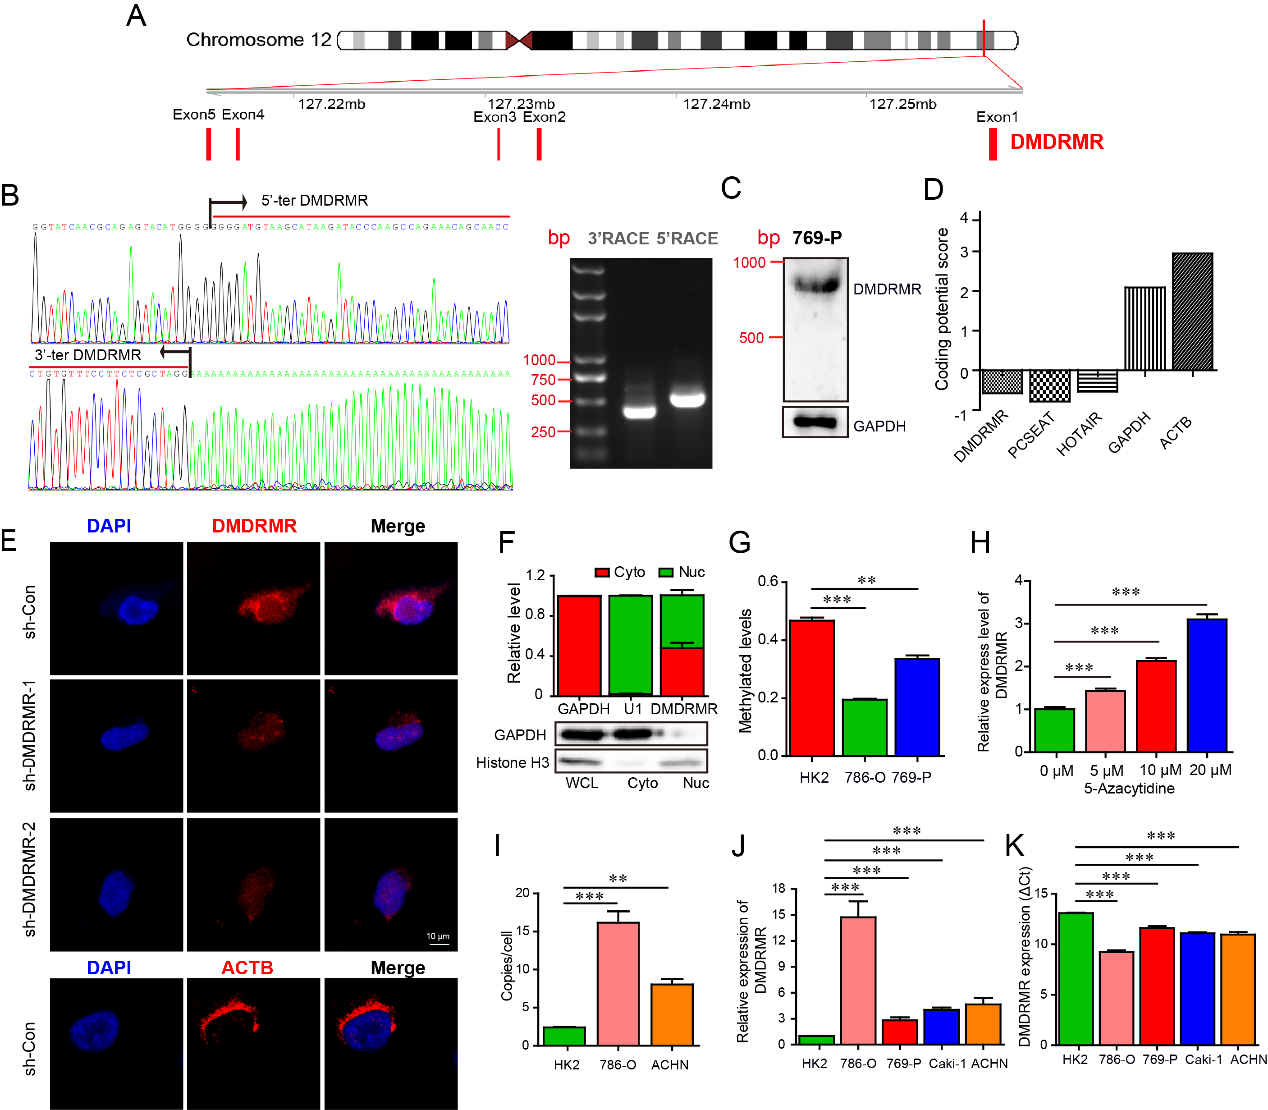
**

**Figure S5. The molecular characteristics of *DMDRMR* in ccRCC.** (A) The location of *DMDRMR* in GRCh37 reference human genome. Red boxes indicate 5 exons of *DMDRMR*. Million base (mb). (B) The 5'- and 3'-RACE analysis of *DMDRMR* sequence. Sequence of PCR products reveal the boundaries between universal anchor primers and *DMDRMR* sequences. Arrows indicate transcriptional directions (left). Gel electrophoresis of PCR products from 5'- and 3'-RACE (right). Terminal (ter). (C) Northern blot analysis of *DMDRMR* in 769-P cell. (D) The protein coding potential of *DMDRMR* predicted by the Coding Potential Calculator (http://cpc.cbi.pku.edu.cn/). *GAPDH* and *ACTB* served as the positive controls of protein coding genes, *PCSEAT* and *HOTAIR* served as the positive controls of non-coding genes. (E) Representative images of *DMDRM*R (top) and *ACTB* (bottom) expression and localization in the indicated cells using RNA FISH assays. *ACTB* as the cytoplasmic control. (F) qRT-PCR analysis of *DMDRMR* expression (top) and immunoblot for the indicated proteins (bottom) in subcellular fractions. *GAPDH* and *U1* served as markers for the cytoplasmic and nuclear genes, respectively. Histone H3 and GAPDH served as the nuclear and cytoplasmic markers for the whole-cell lysates (WCL), cytoplasmic (Cyto) and nuclear (Nuc) fraction, respectively (n = 3). (G) MassARRAY assay analysis of *DMDRMR* promoter DNA methylation levels in three cell lines (n = 3). (H) qRT-PCR analysis of *DMDRMR* expression in the 786-O cells treated with the indicated concentration of 5-azacytidine for 72 h (n = 5). (I) The copy numbers of *DMDRMR* in three cell lines (n = 3). (J) qRT-PCR analysis of *DMDRMR* expression levels in five cell lines (n = 3). (K) ΔCT levels of *DMDRMR* expression in five cell lines from (I) data. The *DMDRMR* levels were normalized against *GAPDH*.


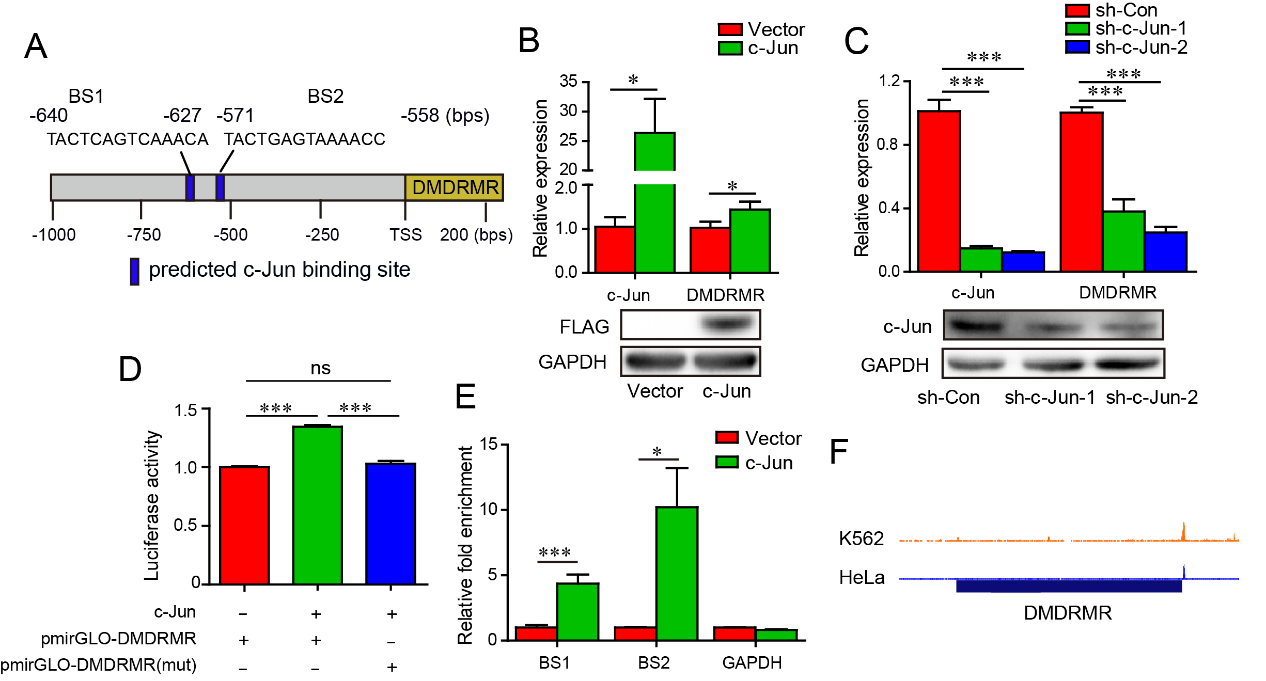


**Figure S6.** *DMDRMR* is transcribed by c-Jun. (A) Two potential c-Jun-binding sites (BSs) in the *DMDRMR* promoter region were predicted. Base positions (bps). (B-C) The qRT-PCR analysis of c-Jun and *DMDRMR* in c-Jun OE (B) and KD (C) 786-O cells (top) (n = 3). Immunoblot of FLAG or c-Jun (bottom). (D) Luciferase reporter assays assessing the predicted BSs cluster transcriptionally responsive to c-Jun OE (n = 6). (E) ChIP qRT-PCR analysis showing the binding efficiency of c-Jun to two identified BSs in the *DMDRMR* promoter in the cells with c-Jun OE (n = 6). *GAPDH* was used as a negative control. (F) Encode ChIP-sequence data for c-Jun were displayed in K562 and HeLa cells across the University of California Santa Cruz (UCSC) Genome Browser illustrations. Blue box indicates *DMDRMR*. The results are presented as mean ± SEM. **p* < 0.05, ***p* <0.01, and ****p* < 0.001.


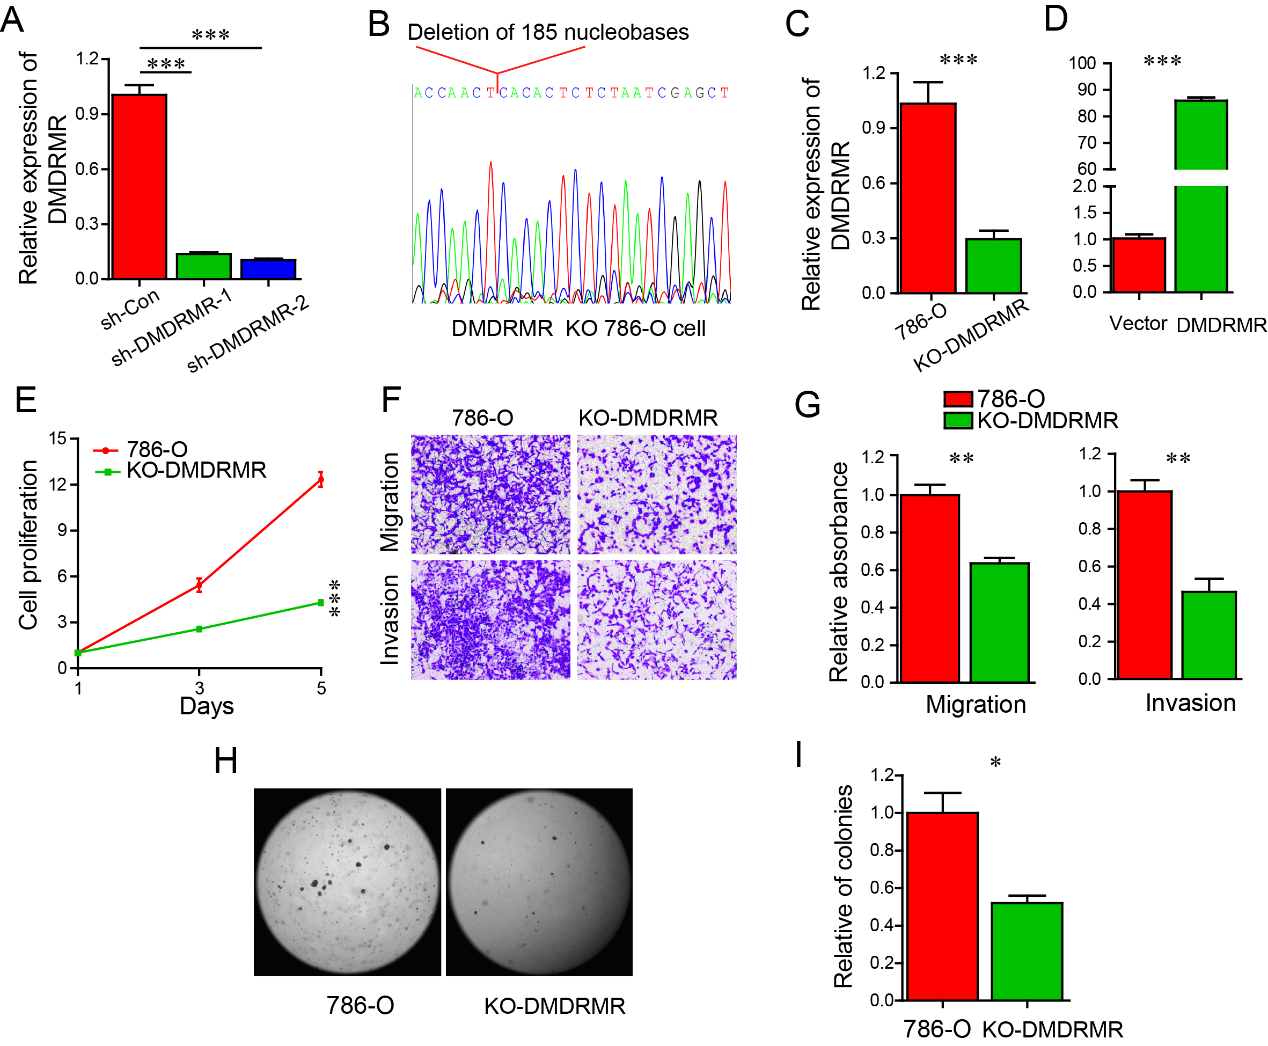


**Figure S7. *DMDRMR* acts as an oncogenic lncRNA in ccRCC.** (A-D) The qRT-PCR analysis of *DMDRMR* in *DMDRMR* KD (A) and KO (C) and OE (D) cells (n = 6). (B) DNA sequenceanalysis of *DMDRMR* KO clone. (E) Cell proliferation assay assessing *DMDRMR* KO cells (n = 3). (F-G) Representative micrographs (F) and quantification (G) of the *DMDRMR* KO cells in the Matrigel-coated or noncoated Transwell assays (n = 3). Representative micrographs (H) and quantification (I) of the *DMDRMR* KO cells in soft agar colony formation assay (n = 3).


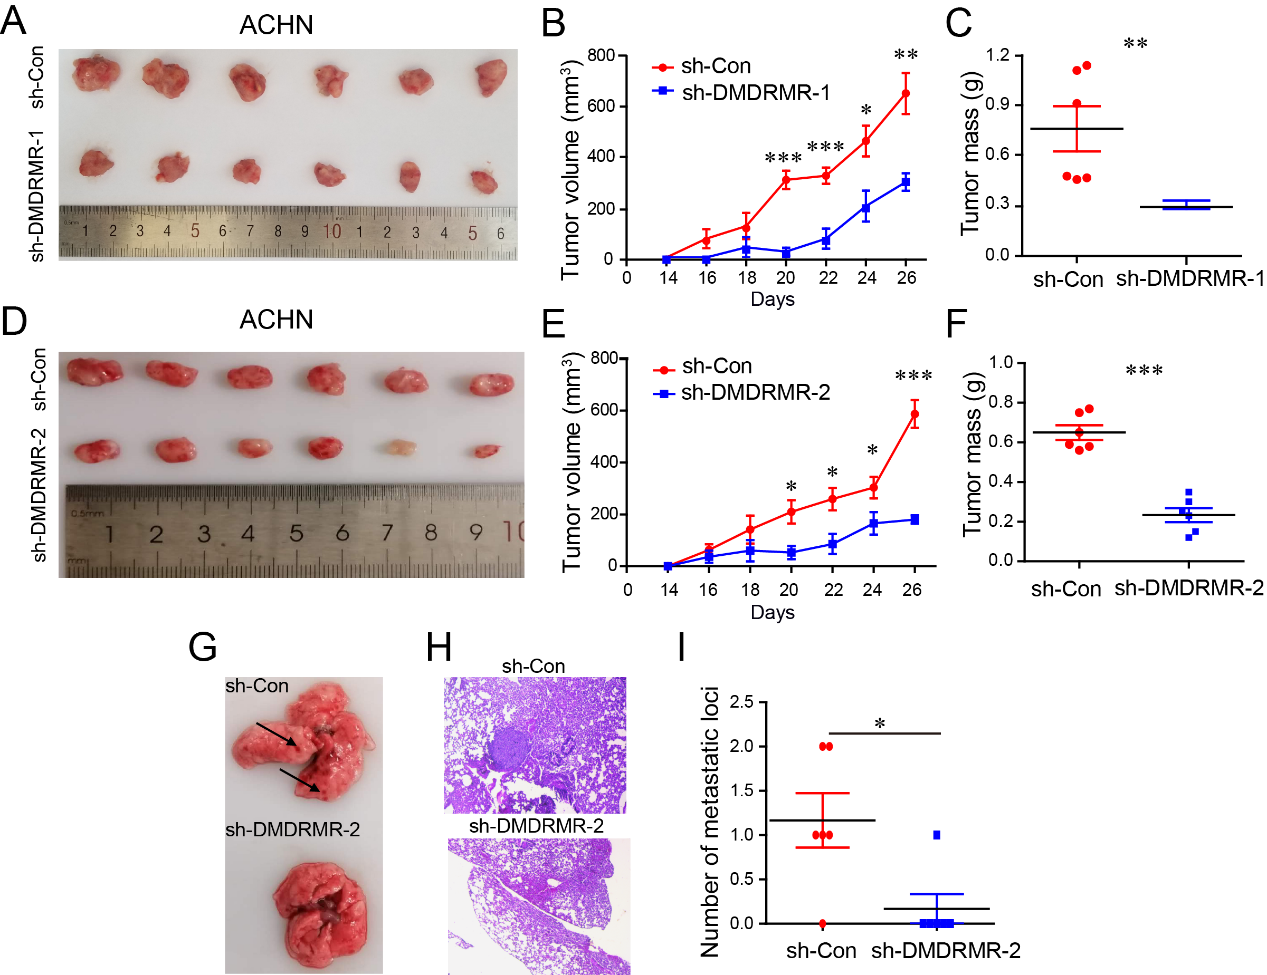


**Figure S8. *DMDRMR* promotes tumor growth and metastasis of ccRCC *in vivo*.** (A and D) Effects of ACHN KD cells mediated by two shRNAs on tumor growth in SC implanted NSG mice (n = 6). (B-C and E-F) Endpoint tumor size (B and E) and mass (C and F) in the NSG mice SC implanted with ACHN KD cells. (G-I) Representative images of bright-field (G) and HE stained samples (H) from the tumor foci of the lungs obtained from the NSG mice, the lateral tail vein of which were injected by 786-O KD cells. (I) Number of metastatic lesions in mice (n = 6), as determined by HE staining. The results are presented as mean ± SEM. **p* < 0.05, ***p* <0.01, and ****p* < 0.001.


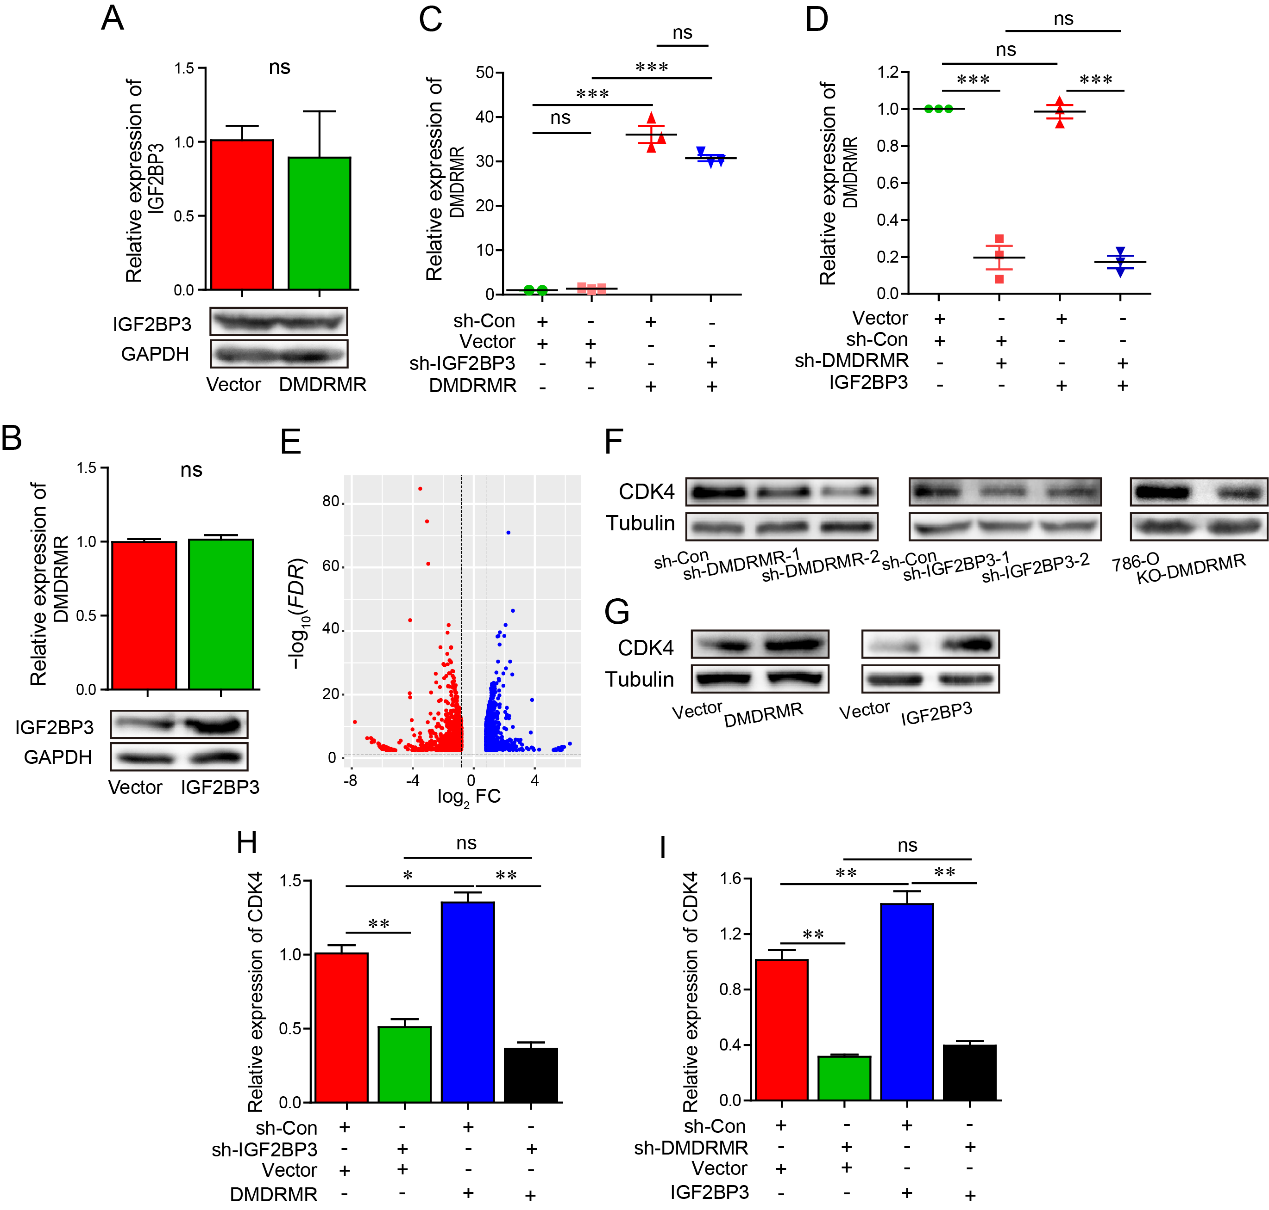


**Figure S9. *DMDRMR* and IGF2BP3 regulate *CDK4*.** (A) The qRT-PCR analysis (top) and immunoblot (down) of IGF2BP3 in *DMDRMR* OE 769-P cells (n = 3). (B) The qRT-PCR analysis (top) of *DMDRMR* and immunoblot (down) of IGF2BP3 in IGF2BP3 OE 769-P cells (n = 6). The qRT-PCR analysis of *DMDRMR* in IGF2BP3 KD 769-P cells with ectopically expressed *DMDRMR* (C) and in *DMDRMR* KD 786-O cells with ectopically expressed IGF2BP3 (D) (n = 3). (E) Volcano plot of the downregulation of 1039 genes (red) and upregulation of 749 genes (blue) between 786-O *DMDRMR* KD and control cells. (F-G) Immunoblot of CDK4 in *DMDRMR* KD and KO and IGF2BP3 KD cells (F), and *DMDRMR* and IGF2BP3 OE cells (G). (H) The mRNA levels of *CDK4* in IGF2BP3 KD 769-P cells with ectopically expressed *DMDRMR* (H) and in *DMDRMR* KD 786-O cells with ectopically expressed IGF2BP3 (I) (n = 6). The results are presented as mean ± SEM. ****p* < 0.001. ns, no significant.


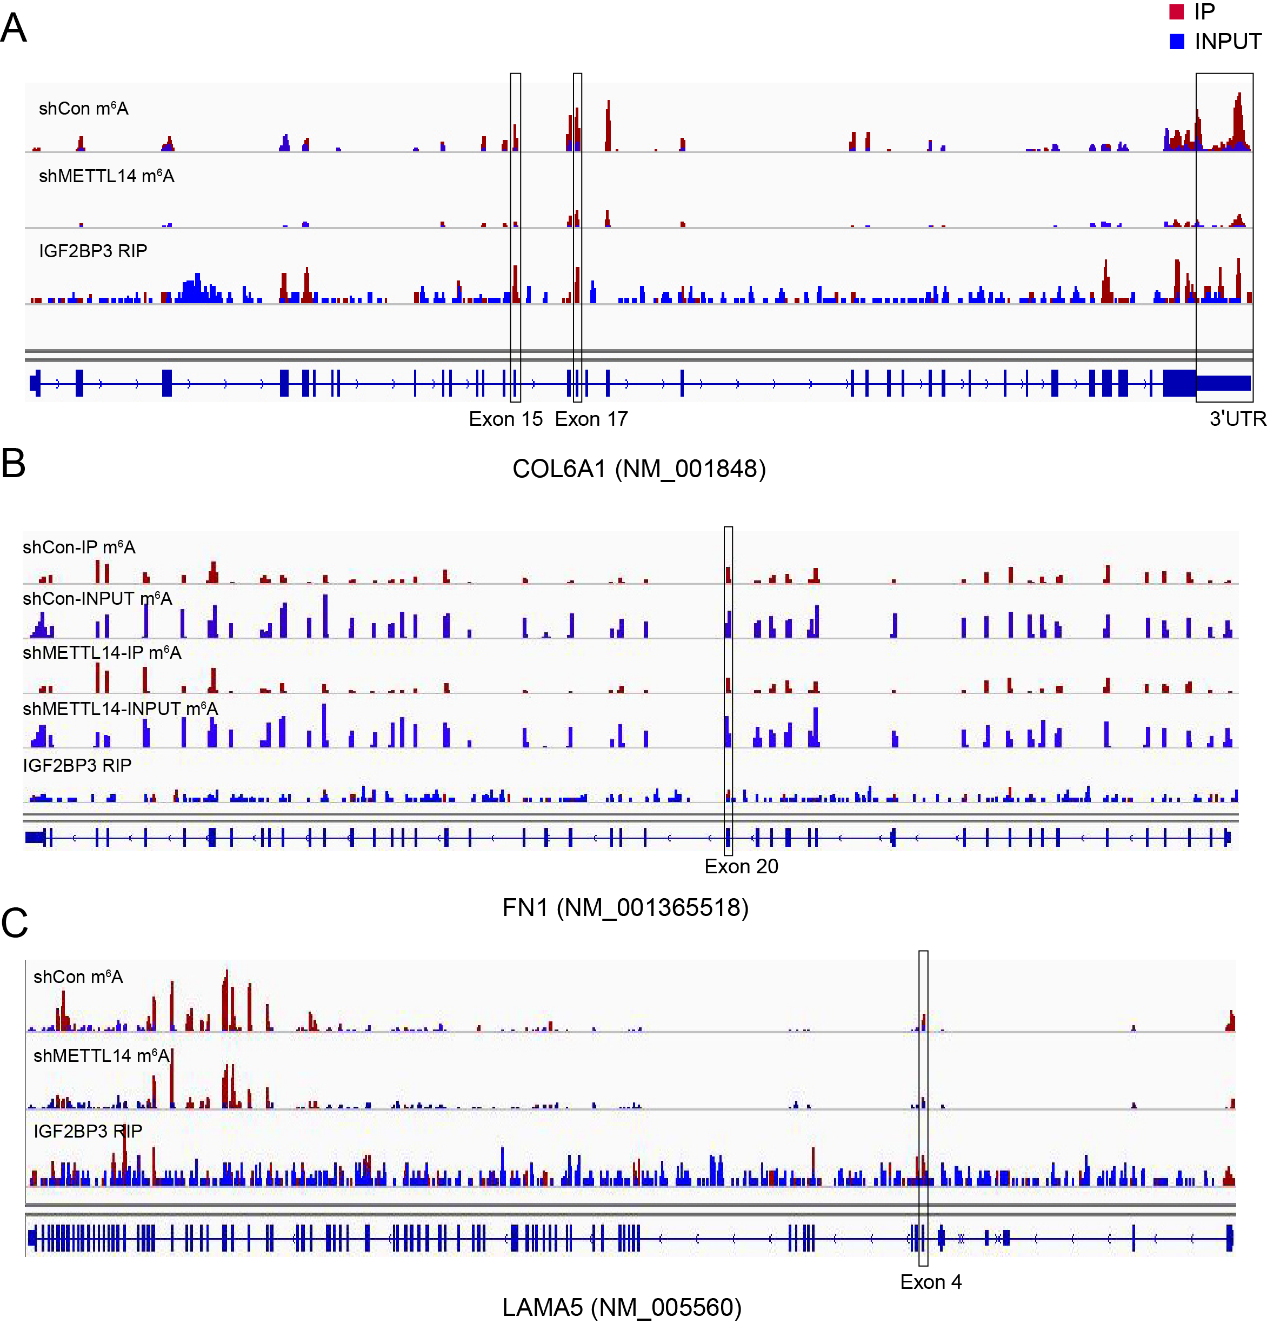


**Figure S10. Distribution of m6A and IGF2BP3 peaks.** Distribution of m6A and IGF2BP3 peaks across *COL6A1* (A), *FN1* (B) and *LAMA5* (C) transcripts, based on m6A RIP- and IGF2BP3 RIP-sequence data. The potential m6A-modified and IGF2BP3 binding regions were marked by rectangles.

**
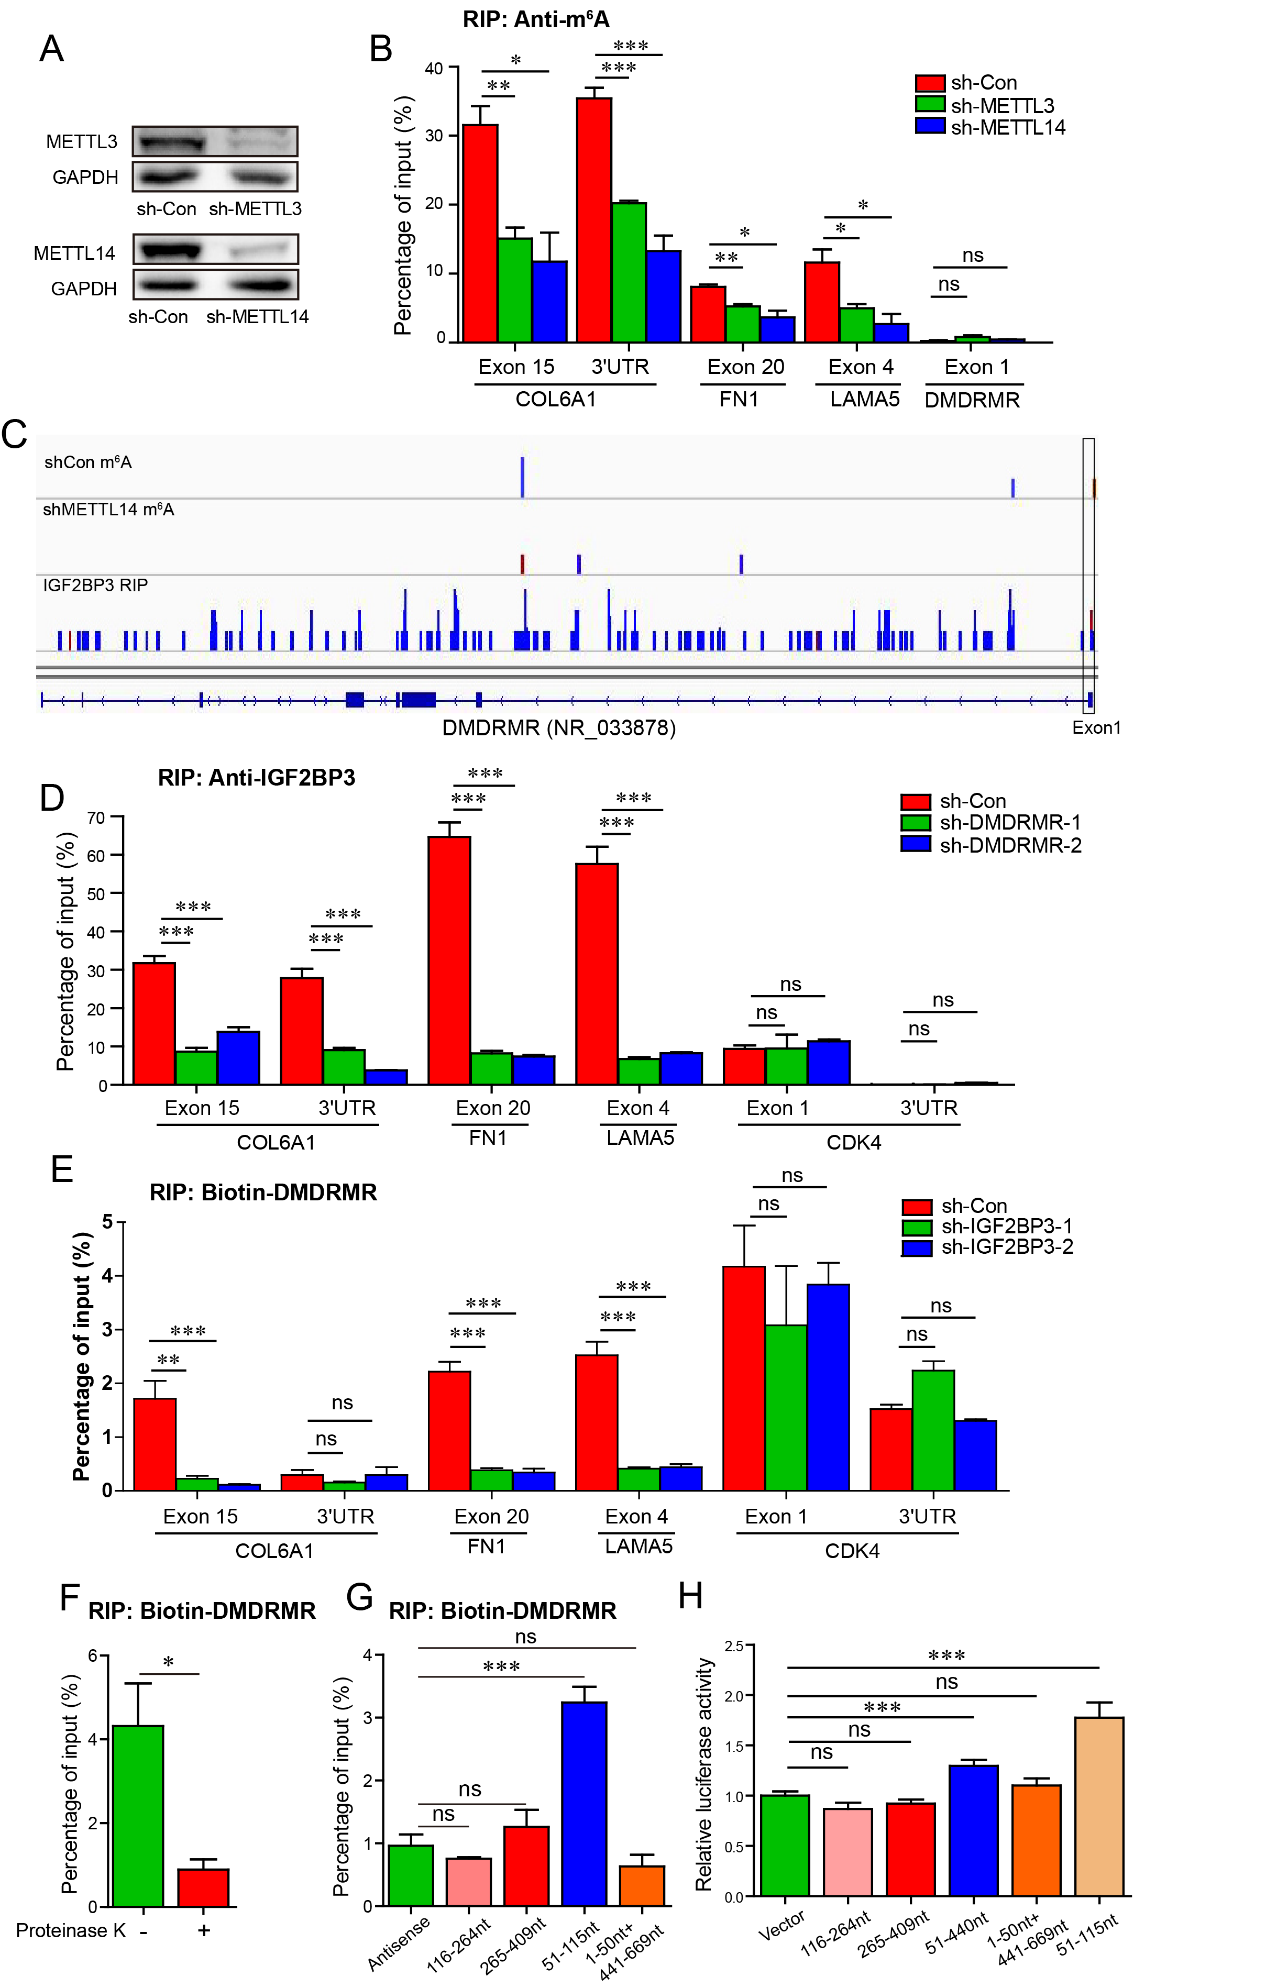
Figure S11. *DMDRMR* binds to their targets in an IGF2BP3-dependent manner.** (A) Immunoblot of METTL3 (top) and METTL14 (bottom) in 769-P METTL3 (top) and METTL14 (bottom) KD cells. (B) RIP qRT-PCR showing the enrichment of m6A modification in the exon 15 and 3' UTR regions of *COL6A1*, the exon 20 of *FN1*, the exon 4 of *LAMA5* and the exon 1 of *DMDRMR* in METTL3 and METTL14 KD cells. (C) Distribution of m6A and IGF2BP3 peaks across *DMDRMR* transcript, based on m6A RIP- and IGF2BP3 RIP-sequence data. The potential IGF2BP3 binding regions were marked by rectangles. (D-E) RIP qRT-PCR detecting the enrichment of IGF2BP3 (D) and biotin-labelled *DMDRMR* (E) to the exon 15 and 3' UTR regions of *COL6A1*, the exon 20 of *FN1*, the exon 4 of *LAMA5*, the exon1 and 3' UTR regions of *CDK4* in *DMDRMR* (D) and IGF2BP3 (E) KD cells. (F) RIP qRT-PCR detecting the enrichment of biotin-labelled *DMDRMR* to *CDK4* 5' UTR in RNA pull-down beads treated with protease K. (G) RIP qRT-PCR detecting the enrichment of biotin-truncated *DMDRMR* to *CDK4* 5' UTR in truncated *DMDRMR* pull-down. (H) Relative luciferase activity levels of *CDK4* 5' UTR WT reporter in the HEK293T cells overexpressing the indicated fragmentsof *DMDRMR* (n = 6). The results are presented as mean ± SEM. **p* < 0.05, ***p* <0.01, and ****p* < 0.001. ns, no significant.


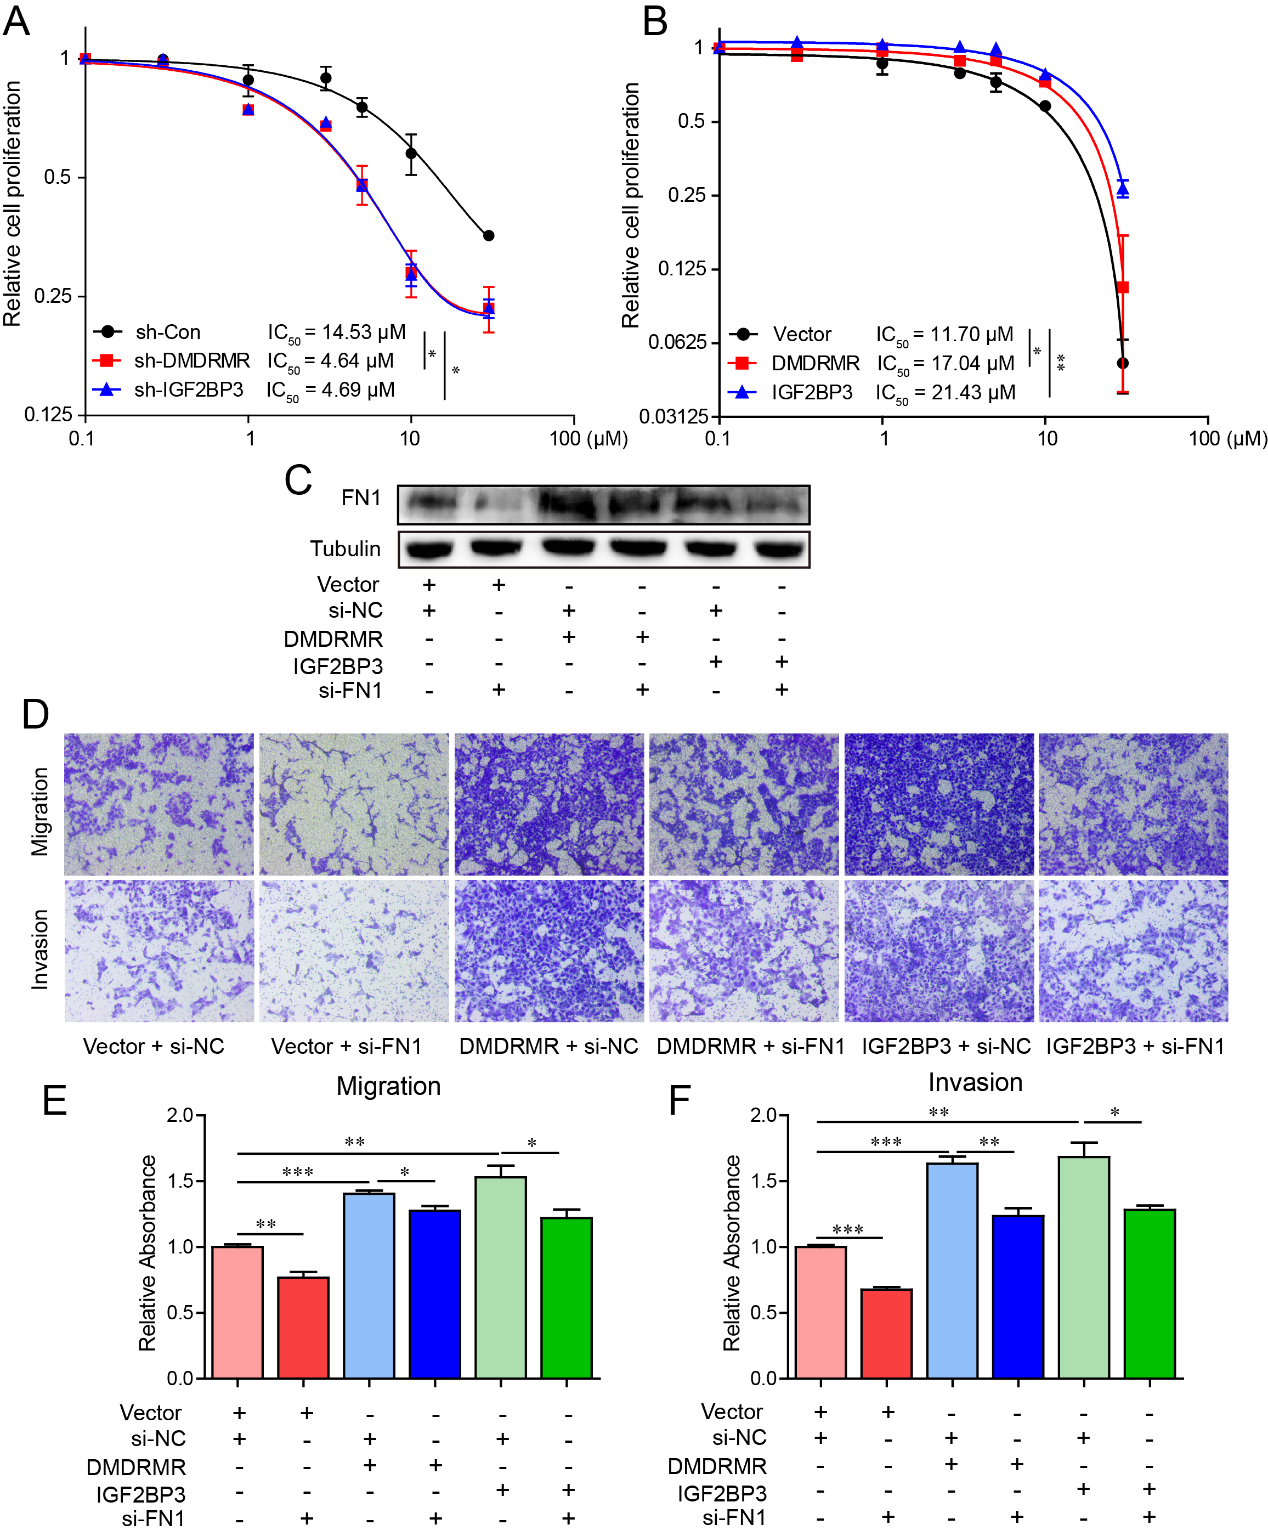


**Figure S12. *DMDRMR* and IGF2BP3 increased the resistance to palbociclib through CDK4 and cell invasion and metastasis through FN1 in ccRCC.** (A-B) Cell proliferation assay assessing *DMDRMR* or IGF2BP3 KD 786-O cells (A), and *DMDRMR* or IGF2BP3 OE 769-P cells (B) treated with palbociclib for 5 days (n = 3), IC50 represents half maximal inhibitory concentration. (C) Immunoblot of FN1 in *DMDRMR* and IGF2BP3 OE 769-P cells with FN1 KD. (D-F) Representative micrographs (D) of migration (top) and invasion (bottom), and quantification (E-F) of the abovementioned cells for migration (E) and invasion (F) in the Matrigel-coated or noncoated Transwell assays (n = 3). Results are presented as the mean ± SEM. **p* < 0.05, ***p* <0.01, and ****p* < 0.001. ns, not significant.


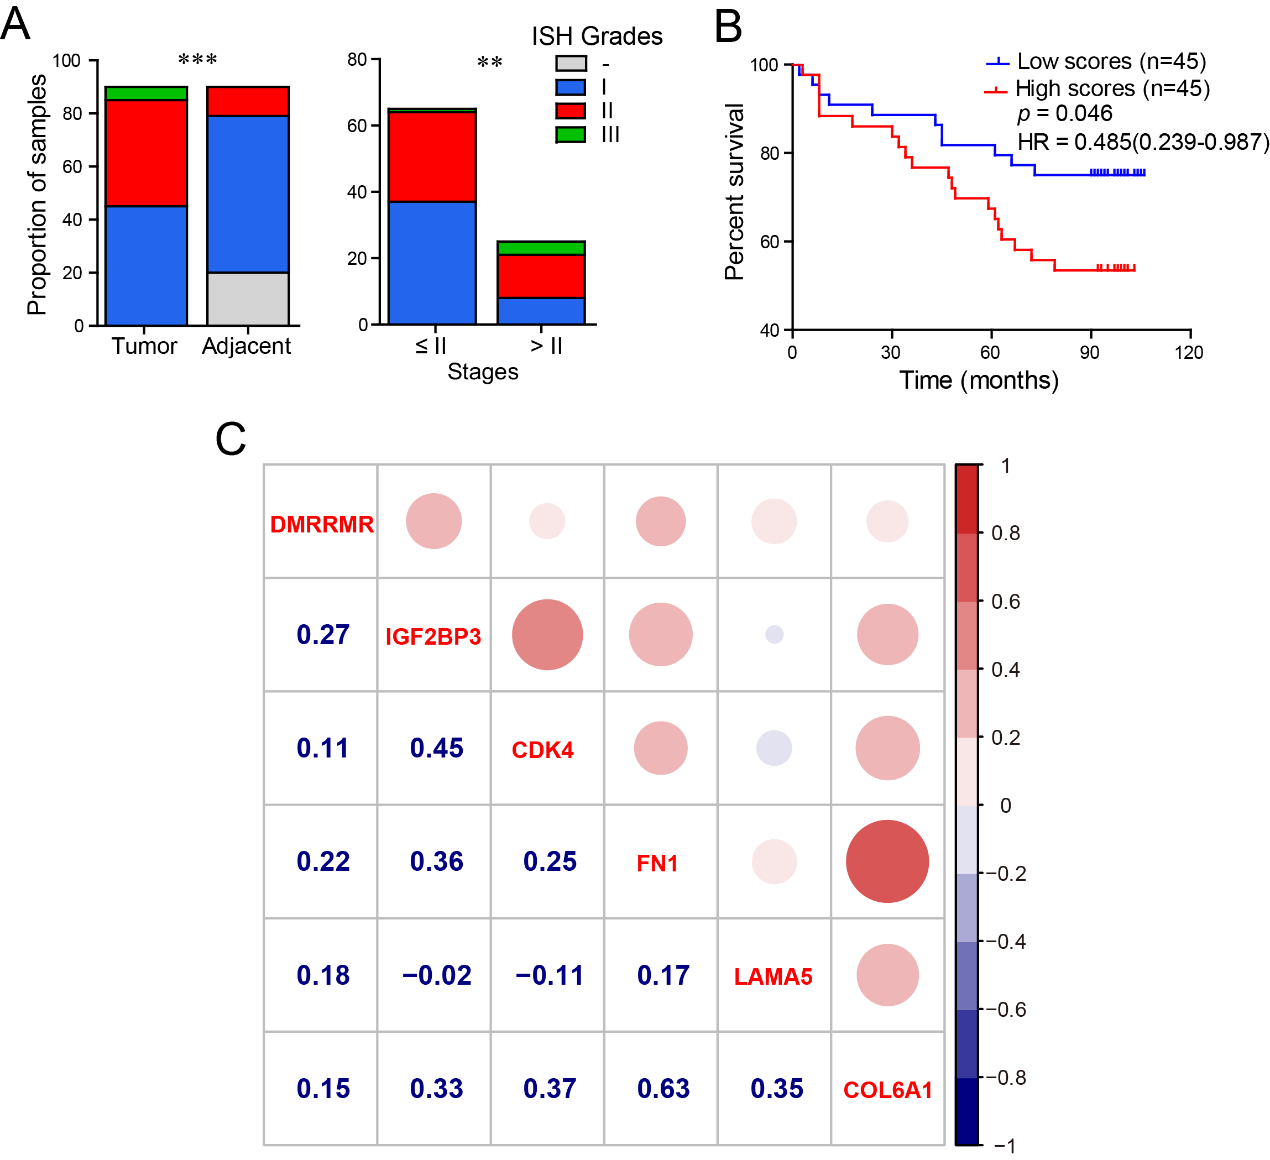


**Figure S13. *DMDRMR* is associated with IGF2BP3 axis in ccRCC.** (A) Quantification of nuclear *DMDRMR* ISH staining in the ccRCC tissues versus matched adjacent tissues (left) and in patients with pathologic stage greater than II (n = 25) versus patients with pathologic stage I+II (n = 65) (right). (B) Kaplan-Meier curve represent the percentages of surviving ccRCC patients with high- and low-*DMDRMR* scores. The score one of nuclear *DMDRMR* expression was used as cut-off value. (C) Correlation analysis of *DMDRMR*, *IGF2BP3*, *CDK4*, *COL6A1*, *FN1* and *LAMA5* with each other across TCGA ccRCC patients. ***p* <0.01 and ****p* < 0.001.


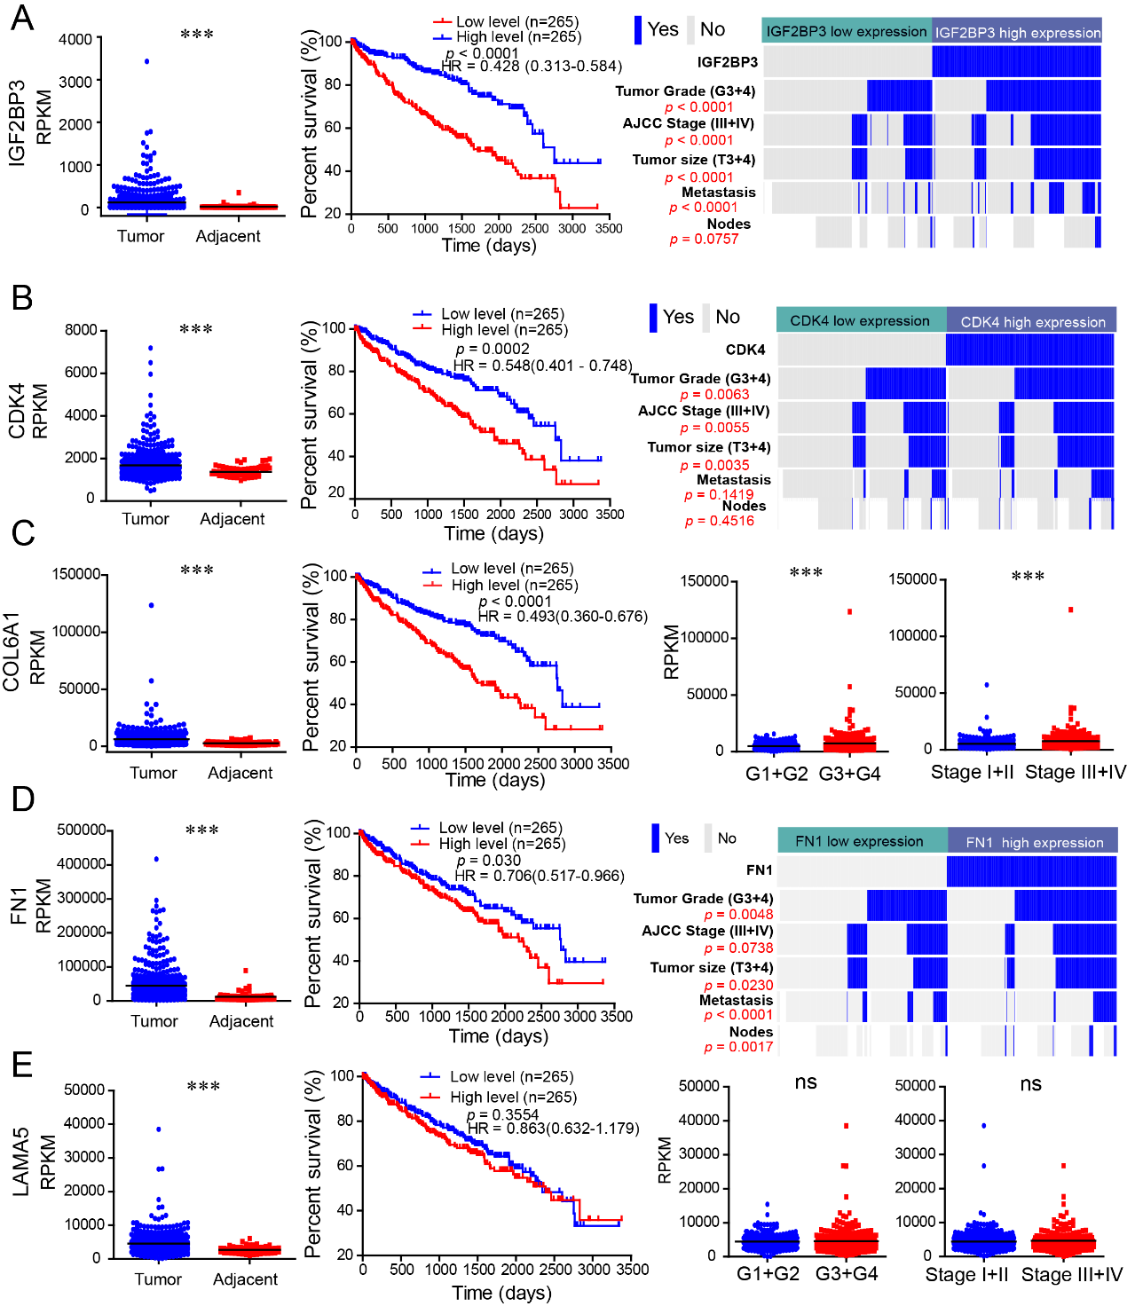


**Figure S14. The clinical relevance of the *IGF2BP3*, *COL6A1*, *CDK4*, *FN1* and *LAMA5* mRNA levels.** Left: The mRNA levels of *IGF2BP3* (A), *CDK4* (B), *COL6A1* (C), *FN1* (D) and *LAMA5* (E) in tumor and adjacent tissues across TCGA ccRCC cohort. Middle: Kaplan-Meier survival analysis of overall survival based on their mRNA levels in the TCGA ccRCC patients, respectively. Right: Heatmap plots illustrate the association of clinical characters with *IGF2BP3* (A), *CDK4* (B) and *FN1* (D) high- and low-levels, respectively. The median expression levels were used as cut-off value. The mRNA express levels of *COL6A1* (C) and *LAMA5* (E) by fuhrman grades (G1+2 versus G3+4) and pathologic stages (stage I+II versus stage III+IV). Reads per kilobase per million mapped reads (RPKM). The results are presented as mean ± SD. ****p* < 0.001. ns, no significant.


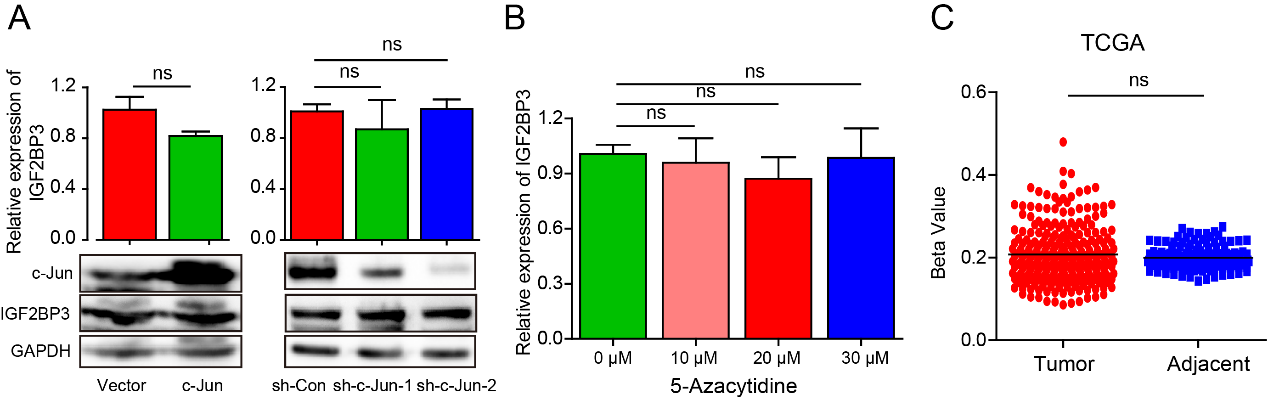


**Figure S15.** IGF2BP3 is not regulated by c-Jun and DNA methylation. (A) The qRT-PCR (top) and immunoblot (bottom) analysis of IGF2BP3 in c-Jun OE (left) and KD (right) 786-O cells (n = 3). (B) qRT-PCR analysis of IGF2BP3 expression in the 786-O cells treated with the indicated concentration of 5-azacytidine for 72 h (n = 3). (C) Promoter methylation levels of *DMDRMR* in ccRCC tumor and adjacent tissues from TCGA. ns, not significant.

**Supplementary Tables**

**Table S1 Clinicopathologic characteristics of ccRCC patients from Shanghai Outdo Biotech CO. cohort in a cDNA microarray.**

| **Characteristics** | **Number of cases** |
| --- | --- |
| **Gender** | |
| Male | 9 |
| Female | 6 |
| **Age (years)** | |
| ≥ 60 | 5 |
| < 60 | 10 |
| **Pathologic stage** | |
| I | 12 |
| II | 2 |
| III | 1 |
| **T classification** | |
| T1 | 12 |
| T2 | 2 |
| T3 | 1 |
| **N classification** | |
| N0 | 15 |
| **M classification** | |
| M0 | 15 |

**Table S2 Clinicopathologic characteristics of ccRCC patients from Shanghai Outdo Biotech CO. cohort in a tissue array.**

| **Characteristics** | **Number of cases** |
| --- | --- |
| **Gender** | |
| Male | 59 |
| Female | 30 |
| Data missing | 1 |
| **Age (years)** | |
| ≥ 60 | 42 |
| < 60 | 46 |
| Data missing | 2 |
| **Pathologic stage** | |
| I | 23 |
| II | 42 |
| III | 25 |
| **T classification** | |
| T1 | 58 |
| T2 | 26 |
| T3 | 6 |
| **N classification** | |
| N0 | 85 |
| N1 | 2 |
| Data missing | 3 |
| **M classification** | |
| M0 | 88 |
| M1 | 2 |
| **Survival status** | |
| Dead | 31 |
| Live | 59 |

**Table S3 Clinicopathologic characteristics of ccRCC patients from the General Hospital of the People's Liberation Army cohort.**

| **Characteristics** | **Number of cases** |
| --- | --- |
| **Gender** | |
| Male | 33 |
| Female | 15 |
| **Age (years)** | |
| ≥ 60 | 20 |
| < 60 | 28 |
| **WHO/ISUP** | |
| I+II | 20 |
| III+IV | 22 |
| Data missing | 6 |
| **Furman grade** | |
| I+II | 16 |
| III+IV | 5 |
| Data missing | 27 |
| **T classification** | |
| T1 | 42 |
| T2 | 5 |
| T3 | 1 |
| **N classification** |  |
| N0 | 44 |
| N1 | 4 |

**Table S4 Clinicopathologic characteristics of ccRCC patients from TCGA cohort.**

| **Characteristics** | **Number of cases** |
| --- | --- |
| **Gender** | |
| Male | 302 |
| Female | 161 |
| **Age (years)** | |
| ≥ 60 | 254 |
| < 60 | 209 |
| **Furman grade** | |
| G1 | 8 |
| G2 | 195 |
| G3 | 181 |
| G4 | 73 |
| Data missing | 6 |
| **Pathologic stage** | |
| I | 223 |
| II | 48 |
| III | 115 |
| IV | 77 |
| **T classification** | |
| T1 | 228 |
| T2 | 59 |
| T3 | 165 |
| T4 | 11 |
| **N classification** | |
| N0 | 220 |
| N1 | 17 |
| Data missing | 226 |
| **M classification** | |
| M0 | 387 |
| M1 | 76 |
| **Survival status** | |
| Dead | 151 |
| Live | 312 |

**Table S5 List of RIP qRT-PCR primers.**

| **Regions** | **Forwards (5'-3')** | **Reverses (5'-3')** |
| --- | --- | --- |
| CDK4 5' UTR | GCTTGCGGCCTGTGTCTAT | AGATCAAGGGAGACCCTCACG |
| CDK4 exon1 | GCTACCTCTCGATATGAGCCA | ACTCTCACACTCTTGAGGGC |
| CDK4 3' UTR | CGAGCTCTGCAGCACTCTTA | AGGACCCTCCATAGCCTCAG |
| COL6A1 exon15 | GTTTGACGGCATTCAAGGAC | GTCTCCAGATGGTCCCGAG |
| COL6A1 3' UTR | GGAGGCCGTTGCAGACATAA | GGCTCTCATGTCCAGTCCAG |
| FN1 exon20 | GGATGCTCCCACTAACCTCC | GGCTGTCCTCTTCGGGTAAG |
| LAMA5 exon4 | CCAAGAGGGACTGTCTGGAG | ACACCACGATCTCTCCGTTC |
| *DMDRMR* exon1 | AAACAGCAACCCTTCCAGG | GAGAAGTCTTCTTCCGACCG |
| c-MYC CRD | GCATACATCCTGTCCGTCCA | GTCGTTTCCGCAACAAGTCC |
| HPRT1 | TGACACTGGCAAAACAATGCA | GGTCCTTTTCACCAGCAAGCT |

**Table S6 List of qRT-PCR primers.**

| **Genes** | **Forwards (5'-3')** | **Reverses (5'-3')** |
| --- | --- | --- |
| c-Jun | TCCAAGTGCCGAAAAAGGAAG | CGAGTTCTGAGCTTTCAAGGT |
| *DMDRMR* | ATGCTGGAAGAACGAGCCTT | GGCCCTGGTCCTAGGTCATA |
| IGF2BP3 | TCGAGGCGCTTTCAGGTAAA | AAACTATCCAGCACCTCCCAC |
| CDK4 | GGCCTGTGTCTATGGTCGG | GGCACCGACACCAATTTCAG |
| COL6A1 | ATTGCCAAGGACTTCGTCGT | TCCACTGCAGGCTCTTGATG |
| FN1 | ACAAGCATGTCTCTCTGCCAA | GCAATGTGCAGCCCTCATTT |
| LAMA5 | GGACTGCAGGCCACCG | TTCCTATGTCGGGCCAGGAT |
| c-MYC | TTCGGGTAGTGGAAAACCAG | AGTAGAAATACGGCTGCACC |
| GAPDH | GGAGCGAGATCCCTCCAAAAT | GGCTGTTGTCATACTTCTCATGG |
| THBS3 | GGAGATGCCTGTGACAACGA | GCTGTCTGCATCTGTCTGGG |
| TLN1 | AGAACGGAAACCTGCCAGAG | TGAATTGCCTGGTTTGCACG |
| AGRN | CCTATGTGTGCCTGTGTCCC | TCTCATTGGCCAGTTCGCTC |
| EGLN2 | CTACTGCGCTCAGAAGGGGC | AGTCCTCTGCGGTCCCTAAG |
| STK36 | TGAGCGCCTTTGTCCTCTG | CCCTTGTACACCCTCCCAAA |
| U1 | GGGAGATACCATGATCACGAAGGT | CCACAAATTATGCAGTCGAGTTTCCC |

**Table S7 Antisense probe targeting *DMDRMR* and *ACTB*.**

| **Probes** | **Sequences (5'-3')** |
| --- | --- |
| *DMDRMR* Probe 1 | CTTGTTATTGTTACTGAGACGAGAAGTCTTCTTCCGACCGAAGGTTCTTCTCAATCGAAGGGTTCGTGGTCTCACGGCTTCAAGGAATGAAGCCGTGGACGGCAGTGGCGAGTGTTACAGCTCGATTAGAGAGTGTGCTGCGGCAAGA |
| *DMDRMR* Probe 2 | CCGCCCCAAGGCTCGTTCTTCCAGCATTTCTATCATTCTCTCTCTCTGTCTGTCTTCCTGATGTGCGTCTAGTCTAGGCTGTTTTTCTTGTTATTGTTACTGAGACGAGAAGTCTTCTTCCGACCGAAGGTTCTTCTCAATCGAAGGGTTCGTGGTCTCACGGCTTCAAGGAATGAAGCCGTGGACGGCAGTGGCGAGTGTTACAGCTCGATTAGAGAGTGTGCTGCGGCAAGATTTATT |
| *ACTB* Probe | CTCATTGTAGAAGGTGGGTGCCA |

**Table S8 Sequences of shRNA and siRNA for KD.**

| **Targets** | **shRNA-Forward (5'-3')** | **shRNA-Reverse (5'-3')** |
| --- | --- | --- |
| sh-c-Jun-1 | GATCCGCAAACCTCAGCAACTTCAACTCGAGTTGAAGTTGCTGAGGTTTGCGTTTTTG | AATTCAAAAACGCAAACCTCAGCAACTTCAACTCGAGTTGAAGTTGCTGAGGTTTGCG |
| sh-c-Jun-2 | GATCCCTATCGACATGGAGTCTCAGCTCGAGCTGAGACTCCATGTCGATAGGTTTTTG | AATTCAAAAACCTATCGACATGGAGTCTCAGCTCGAGCTGAGACTCCATGTCGATAGG |
| sh-DMDRMR-1 | GATCCGGTATCGCCCAGATCTGAATCTTCAAGAGAGATTCAGATCTGGGCGATACCTTTTTTG | AATTCAAAAAAGGTATCGCCCAGATCTGAATCTCTCTTGAAGATTCAGATCTGGGCGATACCG |
| sh-DMDRMR-2 | GATCCTCGCCCAGATCTGAATCCACACTTCAAGAGAGTGTGGATTCAGATCTGGGCGATTTTTTG | AATTCAAAAAATCGCCCAGATCTGAATCCACACTCTCTTGAAGTGTGGATTCAGATCTGGGCGAG |
| sh-IGF2BP3-1 | GATCCGCAAAGGATTCGGAAACTTCATTCAAGAGATGAAGTTTCCGAATCCTTTGCTTTTTTG | AATTCAAAAAAGCAAAGGATTCGGAAACTTCATCTCTTGAATGAAGTTTCCGAATCCTTTGCG |
| sh-IGF2BP3-2 | GATCCGCTGAGAAGTCGATTACTATCTTCAAGAGAGATAGTAATCGACTTCTCAGCTTTTTTG | AATTCAAAAAAGCTGAGAAGTCGATTACTATCTCTCTTGAAGATAGTAATCGACTTCTCAGCG |
| shMETTL3 | GATCCGGATACCTGCAAGTATGTTCATTCAAGAGATGAACATACTTGCAGGTATCCTTTTTTG | AATTCAAAAAAGGATACCTGCAAGTATGTTCATCTCTTGAATGAACATACTTGCAGGTATCCG |
| sh-METTL14 | GATCCGCTGGACTTGGGATGATATTATTCAAGAGATAATATCATCCCAAGTCCAGCTTTTTTG | AATTCAAAAAAGCTGGACTTGGGATGATATTATCTCTTGAATAATATCATCCCAAGTCCAGCG |
| si-FN1 | CAGTCAAAGCAAGCCCGGTTGTTAT |  |

**Table S9 List of ChIP-qPCR primers.**

| **Regions** | **Forwards (5'-3')** | **Reverses (5'-3')** |
| --- | --- | --- |
| *DMDRMR* promoter BS1 | AATGGGAAGAGTTGTAATGAGGG | AAGTCCCCTTTGATTGGTTGAAG |
| *DMDRMR* promoter BS2 | GGATGGAAACTTCAACCAATCAAAG | GGGTTGGCGGGCCTAGT |

**Table S10 Primers of quantitative DNA methylation.**

| **Regions** | **Primer** | |
| --- | --- | --- |
| cg00440032 | Forward | GAATTGGATTTAGTTTTTAGGTTGAATAG |
| Reverse | AAACCAATACCACATTTATTTTTATTTTAC |
| Sequencing | TGAATAGGAAAAGTTAATAGAATT |
| *DMDRMR*  Promoter  (TSS-259~-595) | Forward | aggaagagagTGGGATTTTAAGAATTTAAGTGTGAG |
| Reverse | cagtaatacgactcactatagggagaaggctTCAAACTAATCTCAACCTCCTAACC |
| *DMDRMR*  Promoter  (TSS-570~-965) | Forward | aggaagagagATAAGGGGATGTAAGTATAAGATATTTAAG |
| Reverse | cagtaatacgactcactatagggagaaggctATCTTAAAAACAACACTAAAAATACAAACA |

**Table S11 List of primary antibodies.**

| **Antibodies** | | **Manufacturer** | **Application** |
| --- | --- | --- | --- |
| IGF2BP3 | Proteintech, #14642-1-AP | | 1:1000 for WB, 5μg for RIP, 1:200 for IHC, 1:250 for IF |
| GAPDH | Proteintech, #60004-1-Ig | | 1:5000 for WB |
| Tubulin | Proteintech, #66031-1-Ig | | 1:5000 for WB |
| CDK4 | Abcam, #ab108357 | | 1:3000 for WB |
| METTL3 | Proteintech, #15073-1-AP | | 1:2000 for WB |
| METTL14 | Proteintech, #26158-1-AP | | 1:2000 for WB |
| FLAG | Cell Signaling Technology, #14793 | | 1:2000 for WB, 5 μg for RIP |
| m6A | Synaptic Systems, #202003 | | 8 μg for RIP |

**Table S12 Nucleotide sequences of *DMDRMR* (5**'**-3**'**).**

| GGGGATGTAAGCATAAGATACCCAAGCCAGAAACAGCAACCCTTCCAGGTCCCCTTCCCCCACGTGGAAGCTTTCCTTTCACTTTCGCTTTAATAAATCTTGCCGCAGCACACTCTCTAATCGAGCTGTAACACTCGCCACTGCCGTCCACGGCTTCATTCCTTGAAGCCGTGAGACCACGAACCCTTCGATTGAGAAGAACCTTCGGTCGGAAGAAGACTTCTCGTCTCAGTAACAATAACAAGAAAAACAGCCTAGACTAGACGCACATCAGGAAGACAGACAGAGAGAGAGAATGATAGAAATGCTGGAAGAACGAGCCTTGGGGCGGTATCGCCCAGATCTGAATCCACACAGCAGCTGCTTCGGTCCCTGTAACTCAAGGCTTCCTCTTAATCCTCTGTCCTCCATCAACACCTGGCTGAGCAGGAACAACTATGACCTAGGACCAGGGCCTTCAGGAATCTTCACCCCTAACTTGAACTTCATAACACTGGAGAGAGAGACTGTGGAATGGAATGACTCTCCAGAGCTGCAGATTGAAGGCATATTTTCATCTGACTTTGATCTCAATGGCGGGAACACCTTCATGGCCCCTTTATAGCTGGTATGTTTTCTTCTTATGGACAATGAGAAACATGTAATAAACTGTGTTTCCTTCTCGCTAGG |
| --- |

**References**

1. Clough E, Barrett T. The Gene Expression Omnibus Database. *Methods Mol Biol* **2016**;1418:93-110.

2. Livak KJ, Schmittgen TD. Analysis of relative gene expression data using real-time quantitative PCR and the 2(-Delta Delta C(T)) Method. *Methods* **2001**;25:402-8.

3. Qu L, Ding J, Chen C, Wu ZJ, Liu B, Gao Y*, et al.* Exosome-Transmitted lncARSR Promotes Sunitinib Resistance in Renal Cancer by Acting as a Competing Endogenous RNA. *Cancer Cell* **2016**;29:653-68.

4. Love MI, Huber W, Anders S. Moderated estimation of fold change and dispersion for RNA-seq data with DESeq2. *Genome Biol* **2014**;15:550.

5. Lin X, Chai G, Wu Y, Li J, Chen F, Liu J*, et al.* RNA m6A methylation regulates the epithelial mesenchymal transition of cancer cells and translation of Snail. *Nat Commun* **2019**;10:2065.

6. Cruickshank MN, Oshlack A, Theda C, Davis PG, Martino D, Sheehan P*, et al.* Analysis of epigenetic changes in survivors of preterm birth reveals the effect of gestational age and evidence for a long term legacy. *Genome Med* **2013**;5:96.

7. Wang J, Yang X, Li R, Wang L, Gu Y, Zhao Y*, et al.* Long non-coding RNA MYU promotes prostate cancer proliferation by mediating the miR-184/c-Myc axis. *Oncol Rep* **2018**;40:2814-25.

8. Wang P, Luo ML, Song E, Zhou Z, Ma T, Wang J*, et al.* Long noncoding RNA *lnc-TSI* inhibits renal fibrogenesis by negatively regulating the TGF-β/Smad3 pathway. *Sci Transl Med* **2018**;10:eaat2039.
